# Supplementary material
Source: HighWire-hosted journal article supplement (doi:10.1101/rna.079801.123)
Supplement: Supplemental_Table_1.xlsx [file Supplemental_Table_1.xlsx]

## Sheet: Sheet1
GeneNames
ACTA2
ACTG2
ACTR3B
ADGRL4
AGR2
AHR
AIF1
AKT1
ALDH1A3
ANLN
AP1M2
APOC1
APOE
AR
AURKA
AZGP1
B2M
BAG1
BANK1
BCL2
BGN
BICC1
BIRC5
BLVRA
BRAF
C10orf54
C1QA
C1QB
CALCRL
CAPN13
CCL2
CCL3
CCL4
CCL5
CCNB1
CCND1
CCNE1
CCNE2
CD14
CD163
CD19
CD2
CD24
CD274
CD34
CD36
CD38
CD3D
CD3E
CD3G
CD4
CD40
CD40LG
CD44
CD5
CD63
CD68
CD69
CD7
CD74
CD79A
CD79B
CD8A
CD9
CD96
CDC20
CDC6
CDH1
CDH11
CDH3
CDK4
CDK6
CDK7
CDKN2A
CEACAM1
CENPF
CEP55
CLDN4
CLU
COBL
COL1A1
COL1A2
COL3A1
COL4A1
COL4A2
COL4A5
CR2
CRABP2
CSRP2
CST3
CSTB
CTCF
CTLA4
CTSL
CXCR5
CXXC5
DCN
DERL3
EFNA5
EGFR
EIF3E
ELF5
EPCAM
ERBB2
ERBB3
ERBB4
ESR1
FABP7
FAP
FASN
FAT1
FCGR3A
FCN1
FCRL5
FGFR1
FGFR2
FGFR4
FN1
FOS
FOXA1
FOXC1
FOXP3
FTL
FXYD3
GATA3
GNG11
GNLY
GPNMB
GPR160
GRB7
GSN
GZMB
HIF1A
HLA-A
HLA-B
HLA-C
HLA-DPA1
HLA-DRA
HLA-DRB1
HLA-DRB5
HLA-E
HSPB1
HSPG2
ICAM1
ICOS
IFITM3
IGF1R
IGFBP5
IGHG1
IGHG4
IGHM
IGKC
IL2RA
IL32
IL3RA
IL7R
ISG15
ISG20
ITGA6
ITGAX
JUN
JUNB
KIF23
KIT
KRAS
KRT10
KRT14
KRT15
KRT17
KRT18
KRT19
KRT5
KRT7
KRT8
LAG3
LAMA1
LAMC1
LDB2
LGALS1
LGALS2
LGMN
LILRB1
LRP2
LST1
LTF
LUM
LYPD6B
LYZ
MAPK13
MAPK3
MDM2
MELK
MIA
MKI67
MLPH
MMP11
MMP12
MMP9
MS4A1
MSR1
MT2A
MUC1
MYB
MYBL2
MYC
MYL6
MYL9
MYLK
MYO10
MYO5B
MZB1
NAT1
NCAM1
NDC80
NDRG2
NF1
NFKBIA
NKG7
NOTCH1
NR3C1
NUF2
OBP2B
ORC6
PABPC1
PBK
PDCD1
PDPN
PDZK1IP1
PECAM1
PGR
PHGDH
PI3
PIK3CA
PLEK
PLVAP
POU2AF1
PRLR
PTEN
PTPRB
PTPRC
PTTG1
RAMP2
RB1
RPL13
RPL18
RPSA
RRM2
S100A14
S100A4
S100A8
S100A9
SDC1
SFRP1
SIAH2
SKAP1
SLC2A1
SLC39A6
SLPI
SNAI2
SOX10
SOX18
SOX4
SPDEF
SPP1
STAT5A
STMN1
SULF1
TAGLN
TBX21
TCF4
TCL1A
TFEC
TFF1
TFF2
TFF3
TFRC
THEMIS
THY1
TIMP1
TMEM45B
TMSB10
TMSB4X
TP53
TPM2
TRAC
TRDC
TSPAN1
TTC6
TTYH1
TYMS
UBE2C
UBE2T
VIM
XBP1
XCL1
ZEB1
ZNF571
