# Supplementary material
Source: HighWire-hosted journal article supplement (doi:10.1101/rna.079801.123)
Supplement: Supplemental_Table_3.xlsx [file Supplemental_Table_3.xlsx]

## Sheet: 1 micron
upregulated proximity-related genes
comparison between two different distance cutoffs, 3 microns and 1 microns, for an immune cell to be considered adjacent to a tumor cell
		3 micron		1 micron
Cell Type X	Cell Type Y	DE [names]	DE [number]	DE [names]	DE [number]	Intersect Genes [name]	Intersect Genes [number]
B cell	Tumor	APOE CCND1 CD68 CD74 CDKN2A COL1A1 COL1A2 COL3A1 COL4A1 CST3 FGFR1 FTL GATA3 HLA.A HLA.B KRT18 KRT19 LYZ MT2A MYL6 SNAI2 TIMP1 TMSB4X TSPAN1	24	APOE CCNB1 CD68 CD74 CDK4 CDKN2A COL1A2 COL3A1 COL4A1 CST3 FCN1 FGFR1 FGFR4 FTL GATA3 HLA.A HLA.B KIF23 KRT18 KRT19 LYZ MYL6 NDC80 SLC39A6 SNAI2 TIMP1 TMSB4X TSPAN1 TYMS	29	APOE CD68 CD74 CDKN2A COL1A2 COL3A1 COL4A1 CST3 FGFR1 FTL GATA3 HLA.A HLA.B KRT18 KRT19 LYZ MYL6 SNAI2 TIMP1 TMSB4X TSPAN1	21
Fibroblast	Tumor	KRT18 MYL6 RPSA TMSB4X TSPAN1	5	FASN KIF23 PTPRC RPSA	4	RPSA	1
Macrophage	Tumor	CD24 HIF1A KRT19 LYZ TFF1	5	CD24 KRT19 LYZ TFF1	4	CD24 KRT19 LYZ TFF1	4
T cell	Tumor	C1QA CD24 CD63 EPCAM FASN FTL KRT18 KRT8 LAMA1 LYZ MYL6 PLVAP RPSA S100A14 SDC1 TFF1 TMSB4X	17	C1QA CD24 CD69 CD74 CDK4 CDK6 EPCAM FASN FOS FTL HLA.A HSPB1 IFITM3 KRAS KRT18 KRT19 KRT8 LAMA1 LYZ MT2A MYL6 PABPC1 PLVAP PTPRB RPSA S100A14 SDC1 TFF1 TMSB4X XBP1	30	C1QA CD24 EPCAM FASN FTL KRT18 KRT8 LAMA1 LYZ MYL6 PLVAP RPSA S100A14 SDC1 TFF1 TMSB4X	16

## Sheet: 0.5 micron
upregulated proximity-related genes
comparison between two different distance cutoffs, 3 microns and 0.5 microns, for an immune cell to be considered adjacent to a tumor cell
		3 micron		0.5 micron
Cell Type X	Cell Type Y	DE [names]	DE [number]	DE [names]	DE [number]	Intersect Genes [name]	Intersect Genes [number]
B cell	Tumor	APOE CCND1 CD68 CD74 CDKN2A COL1A1 COL1A2 COL3A1 COL4A1 CST3 FGFR1 FTL GATA3 HLA.A HLA.B KRT18 KRT19 LYZ MT2A MYL6 SNAI2 TIMP1 TMSB4X TSPAN1	24	CD74 CDK4 COL1A1 COL1A2 COL3A1 DERL3 FCGR3A FCN1 FTL GATA3 HLA.B KRT18 KRT19 LYZ MT2A MYL6 SLC39A6 SNAI2 TMSB4X TSPAN1	20	CD74 COL1A1 COL1A2 COL3A1 FTL GATA3 HLA.B KRT18 KRT19 LYZ MT2A MYL6 SNAI2 TMSB4X TSPAN1	15
Fibroblast	Tumor	KRT18 MYL6 RPSA TMSB4X TSPAN1	5	ACTA2 CD24 CD36 COL3A1 IGHM KIF23 KIT KRT18 KRT19 LYZ MT2A PTPRC RPSA S100A14 SLC2A1 SNAI2 TFF1 TFF3 TMSB4X XBP1	20	KRT18 RPSA TMSB4X	3
Macrophage	Tumor	CD24 HIF1A KRT19 LYZ TFF1	5	CD24 FASN LYZ	3	CD24 LYZ	2
T cell	Tumor	C1QA CD24 CD63 EPCAM FASN FTL KRT18 KRT8 LAMA1 LYZ MYL6 PLVAP RPSA S100A14 SDC1 TFF1 TMSB4X	17	C1QA CD24 ERBB2 FASN GATA3 HLA.A HSPB1 IFITM3 IGF1R KIF23 KRT18 KRT19 KRT8 LYZ MYL6 RPSA S100A14 SDC1 TFF1 TFRC TMSB4X XBP1	22	C1QA CD24 FASN KRT18 KRT8 LYZ MYL6 RPSA S100A14 SDC1 TFF1 TMSB4X	12
