# Supplementary material
Source: HighWire-hosted journal article supplement (doi:10.1101/rna.079801.123)
Supplement: Supplemental_Table_6.xlsx [file Supplemental_Table_6.xlsx]

## Sheet: NonTumorToTumor-Summary+Filter1
		Upregulated+Downregulated Genes																					Upregulated Genes¹								Downregulated Genes
Cell Type X	Cell Type Y	DE [names]	DE [number]	ML [names]	ML [number]	cNMF [names]	cNMF [number]	DE+ML [names]	DE+ML [number]	DE+ML [%]	DE+ML [p-value]	DE+cNMF [names]	DE+cNMF [number]	DE+cNMF [%]	DE+cNMF [p-value]	ML+cNMF [names]	ML+cNMF [number]	ML+cNMF [%]	ML+cNMF [p-value]	DE+ML+cNMF [names]	DE+ML+cNMF [number]		DE [names]	DE [number]	ML [names]	ML [number]	DE+ML [names]	DE+ML [number]	DE+ML [%]		DE [names]	DE [number]	ML [names]	ML [number]	DE+ML [names]	DE+ML [number]	DE+ML [%]
Bcell	Tumor	APOE CCND1 CD68 CD74 CDKN2A COL1A1 COL1A2 COL3A1 COL4A1 CST3 FGFR1 FTL GATA3 HLA.A HLA.B KRT18 KRT19 LYZ MT2A MYL6 SNAI2 SULF1 TIMP1 TMSB4X TSPAN1	25	TIMP1 CD68 NKG7 S100A9 FAT1 CSTB TMSB4X HLA.DRB5 GZMB KRT8	10	GEP9: COL1A2 FN1 COL1A1 CD38 COL4A2 COL4A1 ISG15 COL3A1 ANLN FGFR1 PTEN TIMP1 TAGLN BGN MMP11	15	TIMP1 CD68 TMSB4X	3	30	0.38	COL1A2 COL1A1 COL4A1 COL3A1 FGFR1 TIMP1	6	40	0.07	TIMP1	1	10	0.37	TIMP1	1		APOE CCND1 CD68 CD74 CDKN2A COL1A1 COL1A2 COL3A1 COL4A1 CST3 FGFR1 FTL GATA3 HLA.A HLA.B LYZ MT2A MYL6 SNAI2 TIMP1 TMSB4X TSPAN1	22	TIMP1 CD68 NKG7 S100A9 CSTB TMSB4X HLA.DRB5 GZMB KRT8	9	TIMP1 CD68 TMSB4X	3	33.3333		SULF1	1	FAT1	1	-	-	-
						GEP17: LST1 FAT1 IGHG4 ACTG2 MAPK3 PTTG1 IGHG1 S100A8 ITGA6 CD14 CD24 IGKC LYZ FCN1 EIF3E	15					LYZ	1	6.66667	0.92	FAT1	1	10	0.74	-	-
Bcell	Tumor_ALDH1A3	AHR CD19 FABP7 FCN1 FCRL5 FGFR4 KRT17 LTF MLPH MT2A SLC39A6 SPDEF TRAC TSPAN1 TYMS	15	PECAM1 TRAC ERBB3 KRT10 PTTG1 NDC80 ADGRL4 CD79A C1QA LYPD6B	10	-	-	TRAC	1	10	0.69	-	-	-	-	-	-	-	-	-	-		AHR CD19 FABP7 FCN1 FCRL5 FGFR4 KRT17 LTF MLPH MT2A SLC39A6 SPDEF TRAC TSPAN1 TYMS	15	PECAM1 TRAC ERBB3 KRT10 ADGRL4 CD79A C1QA LYPD6B	8	TRAC	1	12.5		-	-	PTTG1 NDC80	2	-	-	-
Bcell	Tumor_EGFR	ACTA2 ANLN APOE BGN BICC1 C1QA CD19 CD74 CDK4 COL1A1 COL1A2 COL3A1 COL4A1 COL4A2 CTSL FGFR1 FN1 GNG11 HLA.A HLA.B HLA.DRB1 ISG15 KIF23 KRT17 MLPH MMP11 MT2A MYB MYL6 PTEN SNAI2 TCF4 TIMP1 TMSB4X TTC6	35	-	-	-	-	-	-	-	-	-	-	-	-	-	-	-	-	-	-		ACTA2 ANLN APOE BGN BICC1 C1QA CD19 CD74 CDK4 COL1A1 COL1A2 COL3A1 COL4A1 COL4A2 CTSL FGFR1 FN1 GNG11 HLA.A HLA.B HLA.DRB1 ISG15 KIF23 KRT17 MLPH MMP11 MT2A MYB MYL6 PTEN SNAI2 TCF4 TIMP1 TMSB4X TTC6	35	-	-	-	-	-		-	-	-	-	-	-	-
Bcell	Tumor_EPCAM	FAT1 FTL IGKC TFF1	4	KRT19 CD19 IGKC FCN1 TFF1 HIF1A TYMS TMSB4X COL1A1 MYO5B	10	-	-	IGKC TFF1	2	50	0.02	-	-	-	-	-	-	-	-	-	-		TFF1	1	TFF1 HIF1A TYMS TMSB4X COL1A1 MYO5B	6	TFF1	1	100		FAT1 FTL IGKC	3	CD19 IGKC FCN1	3	IGKC	1	33.3333
Bcell	Tumor_CD44	FAT1 FGFR4 IGHG1 IGHG4 LST1	5	-	-	-	-	-	-	-	-	-	-	-	-	-	-	-	-	-	-		-	-	-	-	-	-	-		FAT1 FGFR4 IGHG1 IGHG4 LST1	5	-	-	-	-	-
Bcell	Tumor_PGR	CD68 CD69 CD74 CDK7 CDKN2A CST3 FGFR1 FTL GATA3 GNG11 HLA.B KIF23 MYL9 PTTG1 SNAI2 TIMP1 TPM2	17	LST1 NDC80 PLVAP IGHG1 CD24 IGKC C1QA HLA.B TIMP1 CDK7	10	-	-	HLA.B TIMP1 CDK7	3	30	0.09	-	-	-	-	-	-	-	-	-	-		CD68 CD69 CD74 CDK7 CDKN2A CST3 FGFR1 FTL GATA3 GNG11 HLA.B KIF23 MYL9 SNAI2 TIMP1 TPM2	16	LST1 NDC80 PLVAP IGHG1 TIMP1 CDK7	6	TIMP1 CDK7	2	33.3333		PTTG1	1	CD24 IGKC C1QA HLA.B	4	-	-	-
Bcell_IGHG1	Tumor	APOE CCNB1 CD74 CST3 HLA.B	5	-	-	-	-	-	-	-	-	-	-	-	-	-	-	-	-	-	-		APOE CCNB1 CD74 CST3 HLA.B	5	-	-	-	-	-		-	-	-	-	-	-	-
Bcell_IGHG1	Tumor_ALDH1A3	CD69 FCGR3A LTF TSPAN1	4	-	-	-	-	-	-	-	-	-	-	-	-	-	-	-	-	-	-		FCGR3A LTF TSPAN1	3	-	-	-	-	-		CD69	1	-	-	-	-	-
Bcell_IGHG1	Tumor_EGFR	APOE CD19 KRT17 KRT19 MYL6 TTC6	6	CD69 RPL18 RB1 IL2RA GPR160 GNLY LAG3 GNG11 GRB7 HLA.DRB1	10	-	-	-	-	-	-	-	-	-	-	-	-	-	-	-	-		APOE CD19 KRT17 MYL6 TTC6	5	CD69 RPL18 RB1 IL2RA GPR160 GNLY LAG3 GNG11 HLA.DRB1	9	-	-	-		-	-	-	-	-	-	-
Bcell_IGHG1	Tumor_EPCAM	-	-	-	-	-	-	-	-	-	-	-	-	-	-	-	-	-	-	-	-		-	-	-	-	-	-	-		-	-	-	-	-	-	-
Bcell_IGHG1	Tumor_CD44	-	-	-	-	-	-	-	-	-	-	-	-	-	-	-	-	-	-	-	-		-	-	-	-	-	-	-		-	-	-	-	-	-	-
Bcell_IGHG1	Tumor_PGR	APOE CCNB1 CD68 CD74 COL3A1 CST3 ISG20 MYL9 SNAI2 TIMP1 TPM2	11	TFF3 NKG7 CCND1 TFF1 HLA.E BLVRA COL1A1 CD40 CD163 EPCAM	10	-	-	-	-	-	-	-	-	-	-	-	-	-	-	-	-		APOE CCNB1 CD68 CD74 COL3A1 CST3 ISG20 MYL9 SNAI2 TIMP1 TPM2	11	TFF3 NKG7 CCND1 TFF1 HLA.E BLVRA COL1A1 CD40 CD163	9	-	-	-		-	-	-	-	-	-	-
Bcell_IGKC	Tumor	ACTA2 CDKN2A COL1A1 COL1A2 COL3A1 COL4A1 COL4A2 FAT1 FGFR1 GATA3 LYZ MYL6 PTTG1 SNAI2 SULF1 TMSB4X TYMS	17	-	-	-	-	-	-	-	-	-	-	-	-	-	-	-	-	-	-		ACTA2 CDKN2A COL1A1 COL1A2 COL3A1 COL4A1 COL4A2 FGFR1 GATA3 LYZ MYL6 SNAI2 TMSB4X TYMS	14	-	-	-	-	-		FAT1 PTTG1 SULF1	3	-	-	-	-	-
Bcell_IGKC	Tumor_ALDH1A3	CD19 FGFR4 MT2A SLC39A6 SPDEF TYMS	6	-	-	-	-	-	-	-	-	-	-	-	-	-	-	-	-	-	-		CD19 FGFR4 MT2A SLC39A6 SPDEF TYMS	6	-	-	-	-	-		-	-	-	-	-	-	-
Bcell_IGKC	Tumor_EGFR	ANLN BGN C1QA CD38 CD74 CDK4 COL1A1 COL1A2 COL3A1 COL4A1 COL4A2 CTSL FAT1 FGFR1 FGFR4 FN1 HLA.B ISG15 KIT LST1 MAPK3 MLPH MMP11 MT2A MYL6 PTEN SNAI2 TAGLN TFF2 TIMP1 TMSB4X	31	MYC ISG15 GZMB FGFR1 BAG1 LGALS2 FN1 HLA.A CD9 FAT1	10	-	-	ISG15 FGFR1 FN1 FAT1	4	40	0.01	-	-	-	-	-	-	-	-	-	-		ANLN BGN C1QA CD38 CD74 CDK4 COL1A1 COL1A2 COL3A1 COL4A1 COL4A2 CTSL FGFR1 FN1 HLA.B ISG15 KIT MLPH MMP11 MT2A MYL6 PTEN SNAI2 TAGLN TFF2 TIMP1 TMSB4X	27	MYC ISG15 GZMB FGFR1 BAG1 LGALS2 FN1 HLA.A CD9	9	ISG15 FGFR1 FN1	3	33.3333		FAT1 FGFR4 LST1 MAPK3	4	FAT1	1	FAT1	1	100
Bcell_IGKC	Tumor_EPCAM	FAT1 IGKC KRT19 TFF1	4	KRT19 STMN1 ICOS TFF1 S100A4 MYL6 LTF CD3G PLVAP BCL2	10	-	-	KRT19 TFF1	2	50	0.01	-	-	-	-	-	-	-	-	-	-		TFF1	1	STMN1 ICOS TFF1 MYL6 CD3G PLVAP BCL2	7	TFF1	1	100		FAT1 IGKC	2	S100A4 LTF	2	-	-	-
Bcell_IGKC	Tumor_CD44	FAT1 IGHG4	2	-	-	-	-	-	-	-	-	-	-	-	-	-	-	-	-	-	-		-	-	-	-	-	-	-		FAT1 IGHG4	2	-	-	-	-	-
Bcell_IGKC	Tumor_PGR	ACTA2 CD68 CD69 CDK7 CDKN2A FGFR1 FOS FTL GATA3 GNG11 HIF1A KIF23 PTTG1 S100A9 SNAI2 TPM2	16	CD68 BICC1 FXYD3 SLC39A6 COL4A1 MYL6 CDK7 NDC80 TFRC CDK6	10	-	-	CD68 CDK7	2	20	0.45	-	-	-	-	-	-	-	-	-	-		ACTA2 CD68 CD69 CDK7 CDKN2A FGFR1 FTL GATA3 GNG11 KIF23 S100A9 SNAI2 TPM2	13	CD68 MYL6 CDK7 NDC80 TFRC CDK6	6	CD68 CDK7	2	33.3333		FOS HIF1A PTTG1	3	BICC1 FXYD3 SLC39A6 COL4A1	4	-	-	-
Fibroblast	Tumor	CD3G KRT18 MYL6 RPSA SULF1 TMSB4X TSPAN1	7	TMSB4X RPSA XBP1 MYL6 KRT18 FCRL5 PTTG1 CD3G FAP KRT19	10	GEP8: CD74 HLA.DRB1 HLA.B SPP1 GPNMB HLA.DRA APOE HLA.DRB5 VIM FTL TP53 HLA.A CD8A MMP9 PRLR	15	TMSB4X RPSA MYL6 KRT18 CD3G	5	71.4286	0.01	-	-	-	-	-	-	-	-	-	-		MYL6 RPSA TMSB4X TSPAN1	4	TMSB4X RPSA XBP1 MYL6	4	TMSB4X RPSA MYL6	3	75		CD3G SULF1	2	FCRL5 PTTG1 CD3G FAP	4	CD3G	1	50
						GEP10: SULF1 HIF1A FOXP3 MLPH APOE JUN CD3G MMP11 MMP12 SOX4 FABP7 CD5 PI3 SLC2A1 LAMC1	15					SULF1 CD3G	2	28.5714	0.21	CD3G	1	10	0.71	CD3G	1
						GEP16: KRT18 MYL6 TFF1 KRT19 HSPB1 TMSB4X RPSA XBP1 IFITM3 S100A14 FASN CD63 TFF3 RPL13 CCND1	15					KRT18 MYL6 TMSB4X RPSA	4	57.1429	0.04	KRT18 MYL6 KRT19 TMSB4X RPSA XBP1	6	60	0.01	KRT18 MYL6 TMSB4X RPSA	4
Fibroblast	Tumor_ALDH1A3	CD24 CTSL ERBB2 FTL KIT KRT18 KRT19 LYZ MAPK3 PABPC1 PTPRC RPL18 RPSA SNAI2 STAT5A TFF3 TSPAN1 XBP1	18	PTPRC SPDEF NOTCH1 PDZK1IP1 ITGAX ESR1 CST3 FGFR4 PGR EPCAM	10	-	-	PTPRC	1	10	0.52	-	-	-	-	-	-	-	-	-	-		CTSL FTL KIT LYZ MAPK3 PABPC1 PTPRC RPL18 RPSA SNAI2 STAT5A TFF3 TSPAN1 XBP1	14	PTPRC SPDEF NOTCH1 PDZK1IP1 ITGAX ESR1 CST3 FGFR4	8	-	-	-		-	-	-	-	-	-	-
Fibroblast	Tumor_EGFR	ACTA2 CSTB ICOS KIF23 LTF SDC1	6	XBP1 KRT14 RPL18 CR2 CDH1 NOTCH1 IFITM3 LAMA1 HIF1A CD24	10	-	-	-	-	-	-	-	-	-	-	-	-	-	-	-	-		ACTA2 CSTB KIF23 SDC1	4	XBP1 KRT14	2	-	-	-		ICOS LTF	2	RPL18 CR2 CDH1 NOTCH1 IFITM3 LAMA1 HIF1A	7	-	-	-
Fibroblast	Tumor_EPCAM	CD3G HIF1A HSPG2 JUN LAMA1 MMP11 MYL6 POU2AF1 SKAP1 SULF1	10	PLVAP FASN CD69 HLA.A HIF1A KRT10 SULF1 JUN CD24 KRT18	10	-	-	HIF1A SULF1 JUN	3	30	0.01	-	-	-	-	-	-	-	-	-	-		LAMA1 MYL6 POU2AF1 SKAP1	4	PLVAP FASN CD69 HLA.A	4	-	-	-		CD3G HIF1A HSPG2 JUN MMP11 SULF1	6	HIF1A KRT10 SULF1 JUN CD24	5	HIF1A SULF1 JUN	3	60
Fibroblast	Tumor_CD44	-	-	-	-	-	-	-	-	-	-	-	-	-	-	-	-	-	-	-	-		-	-	-	-	-	-	-		-	-	-	-	-	-	-
Fibroblast	Tumor_PGR	CD3G SDC1	2	TTYH1 MYO10 SDC1 LYZ KRT14 SULF1 CRABP2 HLA.A BRAF STAT5A	10	-	-	SDC1	1	50	0.09	-	-	-	-	-	-	-	-	-	-		SDC1	1	TTYH1 MYO10 SDC1 LYZ KRT14	5	SDC1	1	100		CD3G	1	SULF1 CRABP2 HLA.A BRAF STAT5A	5	-	-	-
Macrophage	Tumor	CD24 FGFR4 FN1 HIF1A IGHG1 IGKC KRT19 LYZ TFF1	9	FOXP3 MYC FABP7 IFITM3 POU2AF1 TFF1 IGHG4 COL4A2 CD24 KRT19	10	GEP16: KRT18 MYL6 TFF1 KRT19 HSPB1 TMSB4X RPSA XBP1 IFITM3 S100A14 FASN CD63 TFF3 RPL13 CCND1	15	TFF1 CD24 KRT19	3	33.3333	0.02	TFF1 KRT19	2	22.2222	0.17	TFF1 KRT19 IFITM3	3	30	0.09	TFF1 KRT19	2		HIF1A LYZ TFF1	3	FOXP3 MYC FABP7 IFITM3 POU2AF1 TFF1	6	TFF1	1	33.3333		FGFR4 FN1 IGHG1 IGKC	4	IGHG4 COL4A2	2	-	-	-
Macrophage	Tumor_ALDH1A3	FN1 IGHG1	2	-	-	-	-	-	-	-	-	-	-	-	-	-	-	-	-	-	-		-	-	-	-	-	-	-		FN1 IGHG1	2	-	-	-	-	-
Macrophage	Tumor_EGFR	-	-	-	-	-	-	-	-	-	-	-	-	-	-	-	-	-	-	-	-		-	-	-	-	-	-	-		-	-	-	-	-	-	-
Macrophage	Tumor_EPCAM	APOE CD24 FAT1 FN1 HLA.B IGHG1 IGHG4 IGKC KRT19 LYZ MAPK3 XBP1	12	KIF23 JUNB CRABP2 CD34 AURKA MYB SULF1 COL4A1 TPM2 KRT19	10	-	-	KRT19	1	10	0.64	-	-	-	-	-	-	-	-	-	-		LYZ XBP1	2	KIF23 JUNB CRABP2 CD34 AURKA MYB SULF1	7	-	-	-		APOE FAT1 FN1 HLA.B IGHG1 IGHG4 IGKC MAPK3	8	COL4A1 TPM2	2	-	-	-
Macrophage	Tumor_CD44	CD24 FAT1 IGHG1 IGHG4 IL7R KRT18 KRT19 LYZ RPSA TFF1	10	-	-	-	-	-	-	-	-	-	-	-	-	-	-	-	-	-	-		IL7R LYZ RPSA TFF1	4	-	-	-	-	-		FAT1 IGHG1 IGHG4	3	-	-	-	-	-
Macrophage	Tumor_PGR	CDKN2A SULF1	2	-	-	-	-	-	-	-	-	-	-	-	-	-	-	-	-	-	-		CDKN2A SULF1	2	-	-	-	-	-		-	-	-	-	-	-	-
Tcell	Tumor	C1QA CD24 CD3G CD63 EPCAM FASN FTL HSPG2 KRT18 KRT8 LAMA1 LYZ MYL6 PLVAP RPSA S100A14 SDC1 TFF1 TMSB4X	19	LYZ CD63 RPSA CD24 EPCAM TMSB4X S100A14 PABPC1 LAMA1 HSPB1	10	GEP16: KRT18 MYL6 TFF1 KRT19 HSPB1 TMSB4X RPSA XBP1 IFITM3 S100A14 FASN CD63 TFF3 RPL13 CCND1	15	LYZ CD63 RPSA CD24 EPCAM TMSB4X S100A14 LAMA1	8	80	0.01	KRT18 MYL6 TFF1 TMSB4X RPSA S100A14 FASN CD63	8	53.3333	0.01	HSPB1 TMSB4X RPSA S100A14 CD63	5	50	0.01	TMSB4X RPSA S100A14 CD63	4		C1QA CD63 FASN FTL KRT8 LAMA1 LYZ MYL6 PLVAP RPSA S100A14 SDC1 TFF1 TMSB4X	14	LYZ CD63 RPSA TMSB4X S100A14 PABPC1 LAMA1 HSPB1	8	LYZ CD63 RPSA TMSB4X S100A14 LAMA1	6	75		CD3G HSPG2	2	-	-	-	-	-
Tcell	Tumor_ALDH1A3	BICC1 CD69 CTSL FAP FN1 FOXP3 JUN LAMA1 MLPH	9	-	-	-	-	-	-	-	-	-	-	-	-	-	-	-	-	-	-		BICC1 CTSL FAP FOXP3 JUN MLPH	6	-	-	-	-	-		CD69 FN1 LAMA1	3	-	-	-	-	-
Tcell	Tumor_EGFR	CD24 CTSL FTL GNG11 KIF23 LGALS2 LYZ SDC1 SOX10 TFRC ZNF571	11	SOX10 TIMP1 EGFR CD38 CCL5 LYZ MELK ZNF571 CDK6 TTC6	10	-	-	SOX10 LYZ ZNF571	3	30	0.01	-	-	-	-	-	-	-	-	-	-		FTL GNG11 KIF23 LGALS2 LYZ SDC1 SOX10 TFRC ZNF571	9	SOX10 TIMP1 CD38 CCL5 LYZ MELK ZNF571 CDK6 TTC6	9	SOX10 LYZ ZNF571	3	33.3333		CTSL	1	-	-	-	-	-
Tcell	Tumor_EPCAM	APOE CD3G CDK4 CDK6 EPCAM FASN GATA3 HSPG2 IGHG1 JUN KRAS KRT18 KRT19 LAMA1 MLPH MYL6 PTPRB RPSA S100A14 SULF1 TFF1 THY1 TMSB4X	23	KRT19 EPCAM TFF1 GATA3 JUN XCL1 CD34 SULF1 LRP2 RPSA	10	-	-	KRT19 EPCAM TFF1 GATA3 JUN SULF1 RPSA	7	70	0.01	-	-	-	-	-	-	-	-	-	-		CDK4 CDK6 FASN KRAS LAMA1 MYL6 PTPRB RPSA S100A14 TFF1 THY1 TMSB4X	12	TFF1 CD34 LRP2 RPSA	4	TFF1 RPSA	2	50		APOE CD3G GATA3 HSPG2 IGHG1 JUN MLPH SULF1	8	GATA3 JUN XCL1 SULF1	4	GATA3 JUN SULF1	3	75
Tcell	Tumor_CD44	ANLN C1QA SDC1 TFF1 TFF2 TMSB4X	6	-	-	-	-	-	-	-	-	-	-	-	-	-	-	-	-	-	-		ANLN C1QA SDC1 TFF1 TFF2 TMSB4X	6	-	-	-	-	-		-	-	-	-	-	-	-
Tcell	Tumor_PGR	C1QA CD69 CD74 HLA.B KRT8 LAMA1 PLVAP PTPRC RPSA TFRC TPM2	11	CSTB PLVAP TPM2 CDK4 IFITM3 CD74 MKI67 FTL SLC2A1 MYL6	10	-	-	PLVAP TPM2 CD74	3	30	0.02	-	-	-	-	-	-	-	-	-	-		C1QA CD69 CD74 HLA.B KRT8 LAMA1 PLVAP RPSA TPM2	9	PLVAP TPM2 CDK4 IFITM3 CD74 FTL MYL6	7	PLVAP TPM2 CD74	3	42.8571		TFRC	1	CSTB MKI67 SLC2A1	3	-	-	-
Tcell_CD3D	Tumor	CD3G ERBB2 FASN HSPB1 KRT18 KRT19 KRT8 LAMA1 S100A14 TFF1 TMSB4X	11	CD63 CD74 AGR2 CRABP2 S100A14 APOE DERL3 IL7R KRT5 EPCAM	10	-	-	S100A14	1	10	0.33	-	-	-	-	-	-	-	-	-	-		FASN HSPB1 KRT8 LAMA1 S100A14 TFF1 TMSB4X	7	CD63 CD74 AGR2 CRABP2 S100A14	5	S100A14	1	20		CD3G	1	APOE DERL3 IL7R KRT5	4	-	-	-
Tcell_CD3D	Tumor_ALDH1A3	ERBB2 JUN MLPH PLEK	4	CAPN13 TRDC SLC2A1 PBK NFKBIA HIF1A GZMB FOS CCL5 LAMA1	10	-	-	-	-	-	-	-	-	-	-	-	-	-	-	-	-		JUN MLPH PLEK	3	CAPN13 TRDC SLC2A1 PBK NFKBIA HIF1A	6	-	-	-		-	-	GZMB FOS CCL5 LAMA1	4	-	-	-
Tcell_CD3D	Tumor_EGFR	C1QA CD24 GNG11 JUN KIF23 LYZ S100A9 SNAI2 SOX10 ZNF571	10	PIK3CA ICAM1 KRT7 CD38 MYL9 KIF23 CCL5 RAMP2 CTCF S100A8	10	-	-	KIF23	1	10	0.24	-	-	-	-	-	-	-	-	-	-		C1QA GNG11 JUN KIF23 LYZ S100A9 SNAI2 SOX10 ZNF571	9	PIK3CA ICAM1 KRT7 CD38 MYL9 KIF23 CCL5 RAMP2 CTCF S100A8	10	KIF23	1	11.1111		-	-	-	-	-	-	-
Tcell_CD3D	Tumor_EPCAM	CD3G CD69 CDKN2A GATA3 LAMA1 MLPH PECAM1 SULF1	8	LAMA1 FASN S100A14 CD74 SULF1 CDC6 CD3G LST1 FN1 EPCAM	10	-	-	LAMA1 SULF1 CD3G	3	37.5	0.1	-	-	-	-	-	-	-	-	-	-		CD69 LAMA1	2	LAMA1 FASN S100A14 CD74	4	LAMA1	1	50		CD3G CDKN2A GATA3 MLPH PECAM1 SULF1	6	SULF1 CDC6 CD3G LST1 FN1	5	SULF1 CD3G	2	40
Tcell_CD3D	Tumor_CD44	SDC1 TFF2	2	-	-	-	-	-	-	-	-	-	-	-	-	-	-	-	-	-	-		SDC1 TFF2	2	-	-	-	-	-		-	-	-	-	-	-	-
Tcell_CD3D	Tumor_PGR	CCND1 FASN KRT8 RPSA TPM2	5	CD69 PLVAP MYL6 TPM2 CD63 PTPRB PTPRC LST1 SULF1 CTSL	10	-	-	TPM2	1	20	0.33	-	-	-	-	-	-	-	-	-	-		CCND1 FASN KRT8 RPSA TPM2	5	CD69 PLVAP MYL6 TPM2 CD63 PTPRB	6	TPM2	1	20		-	-	PTPRC LST1 SULF1 CTSL	4	-	-	-
Tcell_CD4	Tumor	LAMA1	1	-	-	-	-	-	-	-	-	-	-	-	-	-	-	-	-	-	-		LAMA1	1	-	-	-	-	-		-	-	-	-	-	-	-
Tcell_CD4	Tumor_ALDH1A3	RPSA	1	-	-	-	-	-	-	-	-	-	-	-	-	-	-	-	-	-	-		RPSA	1	-	-	-	-	-		-	-	-	-	-	-	-
Tcell_CD4	Tumor_EGFR	-	-	-	-	-	-	-	-	-	-	-	-	-	-	-	-	-	-	-	-		-	-	-	-	-	-	-		-	-	-	-	-	-	-
Tcell_CD4	Tumor_EPCAM	APOE KRT18	2	-	-	-	-	-	-	-	-	-	-	-	-	-	-	-	-	-	-		-	-	-	-	-	-	-		APOE	1	-	-	-	-	-
Tcell_CD4	Tumor_CD44	-	-	-	-	-	-	-	-	-	-	-	-	-	-	-	-	-	-	-	-		-	-	-	-	-	-	-		-	-	-	-	-	-	-
Tcell_CD4	Tumor_PGR	ACTA2 MYL9 SNAI2	3	-	-	-	-	-	-	-	-	-	-	-	-	-	-	-	-	-	-		ACTA2 MYL9 SNAI2	3	-	-	-	-	-		-	-	-	-	-	-	-
Tcell_CD8A	Tumor	ANLN C1QA EPCAM FOS LYZ MYL6 PLVAP RB1 RPSA SFRP1 TFF1 TMSB4X	12	PLVAP MAPK3 LYZ TIMP1 IFITM3 MDM2 PTPRB COL3A1 SLC2A1 CD7	10	-	-	PLVAP LYZ	2	20	0.08	-	-	-	-	-	-	-	-	-	-		ANLN C1QA FOS LYZ MYL6 PLVAP RPSA TFF1 TMSB4X	9	PLVAP MAPK3 LYZ TIMP1 IFITM3 MDM2 PTPRB	7	PLVAP LYZ	2	28.5714		RB1 SFRP1	2	COL3A1 SLC2A1 CD7	3	-	-	-
Tcell_CD8A	Tumor_ALDH1A3	SULF1 TSPAN1 XBP1	3	-	-	-	-	-	-	-	-	-	-	-	-	-	-	-	-	-	-		SULF1 TSPAN1 XBP1	3	-	-	-	-	-		-	-	-	-	-	-	-
Tcell_CD8A	Tumor_EGFR	TFRC	1	-	-	-	-	-	-	-	-	-	-	-	-	-	-	-	-	-	-		TFRC	1	-	-	-	-	-		-	-	-	-	-	-	-
Tcell_CD8A	Tumor_EPCAM	EPCAM FASN FOS IGHG1 MYL6 PLVAP PTPRB RPSA TFF1	9	MS4A1 HLA.A RPSA JUNB ICAM1 HLA.DRA HLA.B TMEM45B EPCAM KRT19	10	-	-	RPSA EPCAM	2	22.2222	0.03	-	-	-	-	-	-	-	-	-	-		FASN FOS MYL6 PLVAP PTPRB RPSA TFF1	7	MS4A1 HLA.A RPSA	3	RPSA	1	33.3333		IGHG1	1	JUNB ICAM1 HLA.DRA HLA.B TMEM45B	5	-	-	-
Tcell_CD8A	Tumor_CD44	ANLN C1QA LDB2 SDC1 TFF1 TFF2	6	-	-	-	-	-	-	-	-	-	-	-	-	-	-	-	-	-	-		ANLN C1QA LDB2 SDC1 TFF1 TFF2	6	-	-	-		-		-	-	-	-	-	-	-
Tcell_CD8A	Tumor_PGR	-	-	-	-	-	-	-	-	-	-	-	-	-	-	-	-	-	-	-	-		-	-	-	-	-		-		-	-	-	-	-	-	-
			438		270		105		62				23				17				12			327		174		39				79		74		11
1- upregulated genes without marker genes as mentioned in the "Materials and Methods" section.

## Sheet: TumorToNonTumor-Summary+Filter1
		Upregulated+Downregulated Genes																					Upregulated Genes¹								Downregulated Genes
Cell Type X	Cell Type Y	DE [names]	DE [number]	ML [names]	ML [number]	cNMF [names]	cNMF [number]	DE+ML [names]	DE+ML [number]	DE+ML [%]	DE+ML [p-value]	DE+cNMF [names]	DE+cNMF [number]	DE+cNMF [%]	DE+cNMF [p-value]	ML+cNMF [names]	ML+cNMF [number]	ML+cNMF [%]	ML+cNMF [p-value]	DE+ML+cNMF [names]	DE+ML+cNMF [number]		DE [names]	DE [number]	ML [names]	ML [number]	DE+ML [names]	DE+ML [number]	DE+ML [%]		DE [names]	DE [number]	ML [names]	ML [number]	DE+ML [names]	DE+ML [number]	DE+ML [%]
Tumor	Bcell	ACTA2 AHR AZGP1 BGN CCNB1 CCNE2 CD24 CD38 CD68 CD69 CD74 CDKN2A COL1A1 COL1A2 COL3A1 COL4A1 COL4A2 CST3 DERL3 FASN FAT1 FCN1 FGFR4 FN1 FOS FOXP3 FTL GNG11 GRB7 HIF1A HLA.B HSPB1 IFITM3 IGHG1 IGHG4 IGKC ISG20 KIF23 KRT18 KRT19 LAMA1 LST1 LTF LYZ MAPK3 MDM2 MYL6 MYO10 NDC80 PGR PLVAP PTTG1 RPSA S100A8 SLC39A6 SNAI2 SOX10 SULF1 TCL1A TFF1 TIMP1 TPM2 TRAC XBP1 ZNF571	65	KIF23 JUNB HLA.B KRT19 HIF1A TFF1 HSPB1 IGHG1 IGHG4 IGKC	10	-	-	KIF23 HLA.B KRT19 HIF1A TFF1 HSPB1 IGHG1 IGHG4 IGKC	9	90	0.02	-	-	-	-	-	-	-	-	-	-		ACTA2 AHR AZGP1 BGN CCNB1 CCNE2 CD38 CD68 CD69 CD74 COL1A1 COL1A2 COL3A1 COL4A1 COL4A2 CST3 DERL3 FAT1 FCN1 FGFR4 FN1 FTL GNG11 GRB7 HLA.B ISG20 KIF23 LAMA1 LST1 LTF MAPK3 MYO10 NDC80 PGR PLVAP PTTG1 S100A8 SLC39A6 SNAI2 TCL1A TIMP1 TPM2 TRAC	43	KIF23 JUNB HLA.B	3	KIF23 HLA.B	2	66.6667		CD24 CDKN2A FASN FOS FOXP3 HIF1A HSPB1 IFITM3 KRT18 KRT19 LYZ MDM2 MYL6 RPSA SOX10 SULF1 TFF1 XBP1 ZNF571	19	KRT19 HIF1A TFF1 HSPB1	4	KRT19 HIF1A TFF1 HSPB1	4	100
Tumor_ALDH1A3	Bcell	CCNE2 CD19 CD24 CD74 CDK4 CDKN2A FAT1 FCN1 FGFR4 FOS FOXP3 GRB7 HIF1A HSPB1 HSPG2 ICOS IFITM3 IGHG1 IGHG4 IGKC KRT19 LST1 LTF LYZ MAPK3 MYO10 PTTG1 RPSA S100A8 SLC39A6 SOX10 SULF1 TFF1 TRAC XBP1	35	S100A8 SLC39A6 CD19 ITGA6 LYZ CD24 SULF1 TFF3 IGHG4 IGHG1	10	-	-	S100A8 SLC39A6 CD19 LYZ CD24 SULF1 IGHG4 IGHG1	8	80	0.01	-	-	-	-	-	-	-	-	-	-		CCNE2 CD19 CD74 FAT1 FCN1 FGFR4 LST1 LTF MAPK3 MYO10 PTTG1 S100A8 SLC39A6 TRAC	14	S100A8 SLC39A6 CD19 ITGA6	4	S100A8 SLC39A6 CD19	3	75		CD24 CDK4 CDKN2A FOS FOXP3 GRB7 HIF1A HSPB1 HSPG2 ICOS IFITM3 KRT19 LYZ RPSA SOX10 SULF1 TFF1 XBP1	18	LYZ CD24 SULF1 TFF3	4	LYZ CD24 SULF1	3	75
Tumor_EGFR	Bcell	ANLN BCL2 C1QA CD38 CD69 COL1A1 COL1A2 COL4A1 COL4A2 CST3 FN1 FOXP3 GNG11 HIF1A HLA.B IGHG1 IGHG4 IGKC KIF23 LYZ MYO10 PLVAP SULF1 TIMP1	24	MYO10 GNG11 EPCAM HLA.B CD69 S100A4 FOS THY1 IGHG4 IGKC	10	-	-	MYO10 GNG11 HLA.B CD69 IGHG4 IGKC	6	60	0.01	-	-	-	-	-	-	-	-	-	-		ANLN BCL2 C1QA CD38 CD69 COL1A1 COL1A2 COL4A1 COL4A2 CST3 FN1 GNG11 HLA.B KIF23 MYO10 PLVAP TIMP1	17	MYO10 GNG11 EPCAM HLA.B CD69 S100A4	6	MYO10 GNG11 HLA.B CD69	4	66.6667		FOXP3 HIF1A LYZ SULF1	4	FOS THY1	2	-	-	-
Tumor_EPCAM	Bcell	COL4A1 COL4A2 FN1 GRB7 HIF1A IGHG1 KRT18 KRT19	8	FN1 KIF23 KRAS ACTA2 IL7R COL1A2 CD24 HSPB1 HIF1A IGHG1	10	-	-	FN1 HIF1A IGHG1	3	37.5	0.09	-	-	-	-	-	-	-	-	-	-		COL4A1 COL4A2 FN1 GRB7	4	FN1 KIF23 KRAS ACTA2 IL7R COL1A2	6	FN1	1	25		HIF1A KRT18 KRT19	3	CD24 HSPB1 HIF1A	3	HIF1A	1	33.3333
Tumor_CD44	Bcell	FN1 GNG11 HLA.B KIF23 KRT19 LAMA1 PLVAP TFF1 TPM2	9	KIF23 RB1 GNG11 SNAI2 PDPN KRT19 CD24 HSPB1 TFF1 IGHG1	10	-	-	KIF23 GNG11 KRT19 TFF1	4	44.4444	0.02	-	-	-	-	-	-	-	-	-	-		FN1 GNG11 HLA.B KIF23 LAMA1 PLVAP TPM2	7	KIF23 RB1 GNG11 SNAI2 PDPN	5	KIF23 GNG11	2	40		KRT19 TFF1	2	KRT19 CD24 HSPB1 TFF1	4	KRT19 TFF1	2	100
Tumor_PGR	Bcell	AHR AZGP1 CCNE2 CD24 CD68 COL1A1 FAT1 FGFR4 FOS FTL GRB7 HIF1A HLA.B HSPB1 IGHG1 IGHG4 IGHM IGKC ISG20 KRT18 KRT19 LST1 LYZ MAPK3 MDM2 PGR RPSA S100A8 SLC39A6 SNAI2 TFF1 TPM2 XBP1	33	FAT1 HLA.B KIF23 KRT19 RPL13 MDM2 LYZ XBP1 RPSA IGHG4	10	-	-	FAT1 HLA.B KRT19 MDM2 LYZ XBP1 RPSA IGHG4	8	80	0.01	-	-	-	-	-	-	-	-	-	-		AHR AZGP1 CCNE2 CD68 COL1A1 FAT1 FGFR4 FTL GRB7 HLA.B ISG20 LST1 MAPK3 PGR S100A8 SLC39A6 SNAI2 TPM2	18	FAT1 HLA.B KIF23	3	FAT1 HLA.B	2	66.6667		CD24 FOS HIF1A HSPB1 KRT18 KRT19 LYZ MDM2 RPSA TFF1 XBP1	11	KRT19 RPL13 MDM2 LYZ XBP1 RPSA	6	KRT19 MDM2 LYZ XBP1 RPSA	5	83.3333
Tumor	Bcell_IGHG1	AHR CCNB1 CCNE2 CD19 CD24 CD38 CD74 COL1A1 COL1A2 COL3A1 CST3 CSTB DERL3 FAT1 FCN1 FGFR4 FOS FOXP3 FTL GNG11 HIF1A HLA.B HSPB1 IGHG1 IGHG4 IGKC KRT19 LST1 LTF LYZ MAPK3 NDC80 PGR PTTG1 RPSA S100A8 SLC39A6 SNAI2 SOX10 TFF1 TPM2 TRAC ZNF571	43	S100A8 FAT1 CCNB1 KIF23 TCL1A KRT19 FOS HIF1A IGHG4 IGHG1	10	-	-	S100A8 FAT1 CCNB1 KRT19 FOS HIF1A IGHG4 IGHG1	8	80	0.02	-	-	-	-	-	-	-	-	-	-		AHR CCNB1 CCNE2 CD19 CD38 CD74 COL1A1 COL1A2 COL3A1 CST3 CSTB DERL3 FAT1 FCN1 FGFR4 FTL GNG11 HLA.B LST1 LTF MAPK3 NDC80 PGR PTTG1 S100A8 SLC39A6 SNAI2 TPM2 TRAC	29	S100A8 FAT1 CCNB1 KIF23 TCL1A	5	S100A8 FAT1 CCNB1	3	60		CD24 FOS FOXP3 HIF1A HSPB1 KRT19 LYZ RPSA SOX10 TFF1 ZNF571	11	KRT19 FOS HIF1A	3	KRT19 FOS HIF1A	3	100
Tumor_ALDH1A3	Bcell_IGHG1	CCNE2 CD19 CD24 COL4A1 CSTB FAT1 FCN1 FGFR4 FOS FOXP3 FTL GRB7 HIF1A IGHG1 IGHG4 IGKC KRT19 LST1 LYZ MAPK3 MYO10 PLVAP PTTG1 S100A8 SDC1 SLC39A6 SULF1 TFF1 TRAC	29	S100A8 FCN1 DERL3 FGFR4 TFF1 KRT19 LYZ IGHG4 IGKC IGHG1	10	-	-	S100A8 FCN1 FGFR4 TFF1 KRT19 LYZ IGHG4 IGKC IGHG1	9	90	0.01	-	-	-	-	-	-	-	-	-	-		CCNE2 CD19 CSTB FAT1 FCN1 FGFR4 FTL LST1 MAPK3 MYO10 PLVAP PTTG1 S100A8 SDC1 SLC39A6 TRAC	16	S100A8 FCN1 DERL3 FGFR4	4	S100A8 FCN1 FGFR4	3	75		CD24 COL4A1 FOS FOXP3 GRB7 HIF1A KRT19 LYZ SULF1 TFF1	10	TFF1 KRT19 LYZ	3	TFF1 KRT19 LYZ	3	100
Tumor_EGFR	Bcell_IGHG1	ANLN CD69 COL1A2 CSTB FAT1 FN1 HIF1A HLA.B IGHG1 IGHG4 IGKC KRT19	12	HLA.B ZEB1 PTEN FAT1 CALCRL HIF1A LYZ EGFR IGHG1 IGHG4	10	-	-	HLA.B FAT1 HIF1A IGHG1 IGHG4	5	50	0.01	-	-	-	-	-	-	-	-	-	-		ANLN CD69 COL1A2 CSTB FAT1 FN1 HLA.B	7	HLA.B ZEB1 PTEN FAT1 CALCRL	5	HLA.B FAT1	2	40		HIF1A KRT19	2	HIF1A LYZ EGFR	3	HIF1A	1	50
Tumor_EPCAM	Bcell_IGHG1	-	-	-	-	-	-	-	-	-	-	-	-	-	-	-	-	-	-	-	-		-	-	-	-	-	-	-		-	-	-	-	-	-	-
Tumor_CD44	Bcell_IGHG1	COL1A1 COL1A2 FN1 TPM2	4	-	-	-	-	-	-	-	-	-	-	-	-	-	-	-	-	-	-		COL1A1 COL1A2 FN1 TPM2	4	-	-	-	-	-		-	-	-	-	-	-	-
Tumor_PGR	Bcell_IGHG1	AHR AZGP1 CCNB1 CCNE2 CD24 CST3 CTSL DERL3 FAT1 FCN1 FGFR4 FOS FTL GRB7 HIF1A HLA.B IGHG1 IGHG4 IGKC KRT19 LST1 LYPD6B LYZ MAPK3 PECAM1 PGR PTTG1 S100A8 SLC39A6 TFF1 TPM2 TRAC TSPAN1	33	PGR CCNE2 TPM2 COL4A2 APOC1 S100A8 HLA.B NDC80 CD74 IGHG4	10	-	-	PGR CCNE2 TPM2 S100A8 HLA.B IGHG4	6	60	0.01	-	-	-	-	-	-	-	-	-	-		AHR AZGP1 CCNB1 CCNE2 CST3 CTSL DERL3 FAT1 FCN1 FGFR4 FTL GRB7 HLA.B LST1 LYPD6B MAPK3 PECAM1 PGR PTTG1 S100A8 SLC39A6 TPM2 TRAC TSPAN1	24	PGR CCNE2 TPM2 COL4A2 APOC1 S100A8 HLA.B NDC80 CD74	9	PGR CCNE2 TPM2 S100A8 HLA.B	5	55.5556		CD24 FOS HIF1A KRT19 LYZ TFF1	6	-	-	-	-	-
Tumor	Bcell_IGKC	ACTA2 C1QA CCNE2 CD24 CD38 CD3G CD68 CD69 CDKN2A COL1A1 COL1A2 COL3A1 COL4A1 COL4A2 CST3 FASN FAT1 FCN1 FGFR1 FGFR4 FN1 FOS FOXP3 GNG11 GRB7 HIF1A HLA.B HSPB1 IFITM3 IGHG1 IGHG4 IGKC KIF23 KRT18 KRT19 LAMA1 LST1 LYZ MAPK3 MDM2 MYL6 MYO10 PGR PLVAP PTTG1 RPSA S100A8 SLC39A6 SNAI2 SOX10 SULF1 TFF1 TIMP1 TPM2 TRAC XBP1 ZNF571	57	KIF23 LAMA1 FN1 JUNB KRT19 HIF1A TFF1 IGHG1 IGHG4 IGKC	10	-	-	KIF23 LAMA1 FN1 KRT19 HIF1A TFF1 IGHG1 IGHG4 IGKC	9	90	0.01	-	-	-	-	-	-	-	-	-	-		ACTA2 C1QA CCNE2 CD38 CD68 CD69 COL1A1 COL1A2 COL3A1 COL4A1 COL4A2 CST3 FAT1 FCN1 FGFR1 FGFR4 FN1 GNG11 GRB7 HLA.B KIF23 LAMA1 LST1 MAPK3 MYO10 PGR PLVAP PTTG1 S100A8 SLC39A6 SNAI2 TIMP1 TPM2 TRAC	34	KIF23 LAMA1 FN1 JUNB	4	KIF23 LAMA1 FN1	3	75		CD24 CD3G CDKN2A FASN FOS FOXP3 HIF1A HSPB1 IFITM3 KRT18 KRT19 LYZ MDM2 MYL6 RPSA SOX10 SULF1 TFF1 XBP1 ZNF571	20	KRT19 HIF1A TFF1	3	KRT19 HIF1A TFF1	3	100
Tumor_ALDH1A3	Bcell_IGKC	CD24 CD3G CDK4 CDKN2A FAT1 FCN1 FGFR4 FOS FOXP3 HIF1A HSPB1 HSPG2 IGHG1 IGHG4 IGKC KRT19 LST1 LYZ MAPK3 MDM2 MYL6 MYO10 PTTG1 RPSA S100A8 SLC39A6 SOX10 SULF1 TFF1 TRAC	30	S100A8 FGFR4 AKT1 KRT19 CD24 FASN TFF1 IGHG1 IGHG4 IGKC	10	-	-	S100A8 FGFR4 KRT19 CD24 TFF1 IGHG1 IGHG4 IGKC	8	80	0.02	-	-	-	-	-	-	-	-	-	-		FAT1 FCN1 FGFR4 LST1 MAPK3 MYO10 PTTG1 S100A8 SLC39A6 TRAC	10	S100A8 FGFR4 AKT1	3	S100A8 FGFR4	2	66.6667		CD24 CD3G CDK4 CDKN2A FOS FOXP3 HIF1A HSPB1 HSPG2 KRT19 LYZ MDM2 MYL6 RPSA SOX10 SULF1 TFF1	17	KRT19 CD24 FASN TFF1	4	KRT19 CD24 TFF1	3	75
Tumor_EGFR	Bcell_IGKC	ACTA2 ANLN BCL2 C1QA CD38 CD69 CDK4 COL1A1 COL1A2 COL4A1 COL4A2 FGFR1 FN1 FOXP3 GNG11 GRB7 HIF1A HLA.B IGHG1 IGKC MYO10 PLVAP TAGLN TIMP1 TPM2	25	-	-	-	-	-	-	-	-	-	-	-	-	-	-	-	-	-	-		ACTA2 ANLN BCL2 C1QA CD38 CD69 CDK4 COL1A1 COL1A2 COL4A1 COL4A2 FGFR1 FN1 GNG11 GRB7 HLA.B MYO10 PLVAP TAGLN TIMP1 TPM2	21	-	-	-	-	-		FOXP3 HIF1A	2	-	-	-	-	-
Tumor_EPCAM	Bcell_IGKC	COL4A1 COL4A2 FN1 GRB7 HIF1A IGHG1 KRT18 KRT19	8	FN1 KIF23 KRAS ACTA2 IL7R COL1A2 CD24 HSPB1 HIF1A IGHG1	10	-	-	FN1 HIF1A IGHG1	3	37.5	0.06	-	-	-	-	-	-	-	-	-	-		COL4A1 COL4A2 FN1 GRB7	4	FN1 KIF23 KRAS ACTA2 IL7R COL1A2	6	FN1	1	25		HIF1A KRT18 KRT19	3	CD24 HSPB1 HIF1A	3	HIF1A	1	33.3333
Tumor_CD44	Bcell_IGKC	CCNE1 GNG11 HLA-B KIF23 PLVAP TCF4 TCL1A KRT19 TFF1	9	AZGP1 PTPRC CST3 KIF23 TCL1A GNG11 COL1A1 KRT19 TFRC IGHG1	10	-	-	KIF23 TCL1A GNG11 KRT19	4	44.4444	0.02	-	-	-	-	-	-	-	-	-	-		CCNE1 GNG11 HLA.B KIF23 PLVAP TCF4 TCL1A	7	AZGP1 PTPRC CST3 KIF23 TCL1A GNG11 COL1A1	7	KIF23 TCL1A GNG11	3	42.8571		KRT19 TFF1	2	KRT19 TFRC	2	KRT19	1	50
Tumor_PGR	Bcell_IGKC	AZGP1 CCNE2 CD68 COL1A1 COL1A2 FAT1 FGFR4 FOS GRB7 HIF1A HLA.B HSPB1 IGHG1 IGHG4 IGKC KRT19 LST1 LYZ MAPK3 MDM2 RPSA S100A8 SNAI2 TFF1 TPM2 XBP1	26	MUC1 CD38 KRT19 MDM2 XBP1 TFF1 LYZ IGHG4 IGKC IGHG1	10	-	-	KRT19 MDM2 XBP1 TFF1 LYZ IGHG4 IGKC IGHG1	8	80	0.01	-	-	-	-	-	-	-	-	-	-		AZGP1 CCNE2 CD68 COL1A1 COL1A2 FAT1 FGFR4 GRB7 HLA.B LST1 MAPK3 S100A8 SNAI2 TPM2	14	MUC1 CD38	2	-	-	-		FOS HIF1A HSPB1 KRT19 LYZ MDM2 RPSA TFF1 XBP1	9	KRT19 MDM2 XBP1 TFF1 LYZ	5	KRT19 MDM2 XBP1 TFF1 LYZ	5	100
Tumor	Fibroblast	APOE BGN C1QA CCNB1 CD24 CD36 CD3G CD68 CD69 CD79B CDK6 CDKN2A COL1A1 COL1A2 CRABP2 CTSL ERBB2 FAT1 FN1 FOS FOXP3 GNG11 GZMB HIF1A HLA.B HSPB1 ICOS IFITM3 IGHG1 IGHG4 IGKC IL2RA JUN KIF23 KRT8 KRT18 KRT19 LAMA1 LYZ MDM2 MLPH MYL6 MYO10 NOTCH1 PABPC1 PGR PLVAP RPSA S100A8 SDC1 SOX10 SOX4 SULF1 TFF1 THY1 TPM2 TTC6 XBP1 ZNF571	59	CDC6 ICOS LYZ GZMB LRP2 TPM2 HLA.B CD79B CCNB1 SULF1	10	-	-	ICOS LYZ GZMB TPM2 HLA.B CD79B CCNB1 SULF1	8	80	0.01	-	-	-	-	-	-	-	-	-	-		APOE CD24 CD36 CD3G CDKN2A CRABP2 CTSL ERBB2 FOS FOXP3 GZMB HIF1A HSPB1 ICOS IFITM3 JUN KRT18 KRT19 LYZ MDM2 MLPH MYL6 NOTCH1 PABPC1 RPSA SOX10 SOX4 TFF1 THY1 XBP1 ZNF571	31	CDC6 ICOS LYZ GZMB LRP2	5	ICOS LYZ GZMB	3	60		BGN C1QA CCNB1 CD68 CD69 CD79B CDK6 COL1A1 COL1A2 FAT1 FN1 GNG11 HLA.B IGHG1 IGHG4 IGKC IL2RA KIF23 KRT8 LAMA1 MYO10 PGR PLVAP S100A8 SDC1 TPM2 TTC6	27	TPM2 HLA.B CD79B CCNB1	4	TPM2 HLA.B CD79B CCNB1	4	100
Tumor_ALDH1A3	Fibroblast	APOE C1QA CCNB1 CD24 CD36 CD3E CTSL FASN FAT1 FCN1 FGFR4 FOS FOXP3 GRB7 ICOS IGHG1 IGHG4 IGKC LST1 LYZ MAPK3 MDM2 MLPH PTTG1 RPSA S100A8 SLC39A6 SOX10 SULF1	29	GZMB KRT18 SOX10 TFEC JUN IGHG1 IGKC IGHG4 FAP SULF1	10	-	-	SOX10 IGHG1 IGKC IGHG4 SULF1	5	50	0.09	-	-	-	-	-	-	-	-	-	-		APOE CD24 CD36 CD3E CTSL FASN FOS FOXP3 GRB7 ICOS LYZ MDM2 MLPH RPSA SOX10	15	GZMB KRT18 SOX10 TFEC JUN	5	SOX10	1	20		C1QA CCNB1 FAT1 FCN1 FGFR4 IGHG1 IGHG4 IGKC LST1 MAPK3 PTTG1 S100A8 SLC39A6	13	IGHG1 IGKC IGHG4 FAP	4	IGHG1 IGKC IGHG4	3	75
Tumor_EGFR	Fibroblast	APOE FOS FOXP3 GNG11 KIF23 LTF MYO10 PTPRC SULF1	9	MDM2 HIF1A FOS KRT19 JUN PLEK MYO10 KRT18 CSTB SULF1	10	-	-	FOS MYO10 SULF1	3	33.3333	0.09	-	-	-	-	-	-	-	-	-	-		APOE FOS FOXP3 LTF PTPRC	5	MDM2 HIF1A FOS KRT19 JUN PLEK	6	FOS	1	20		GNG11 KIF23 MYO10	3	MYO10 KRT18 CSTB	3	MYO10	1	33.3333
Tumor_EPCAM	Fibroblast	CCNB1 CD69 CDKN2A FABP7 FAP HSPG2 KIF23 LAMA1 LYZ NOTCH1 PECAM1 SKAP1 XBP1	13	XBP1 AR CD24 GNG11 FABP7 KIF23 TPM2 EPCAM IGHG1 CDH3	10	-	-	XBP1 FABP7 KIF23	3	30	0.05	-	-	-	-	-	-	-	-	-	-		CDKN2A FAP LYZ NOTCH1 PECAM1 SKAP1 XBP1	7	XBP1 AR CD24	3	XBP1	1	33.3333		CCNB1 CD69 FABP7 KIF23 LAMA1	5	GNG11 FABP7 KIF23 TPM2 EPCAM IGHG1 CDH3	7	FABP7 KIF23	2	40
Tumor_CD44	Fibroblast	CCNB1 KIF23 KRT8 LAMA1 LYZ MYO10	6	CD36 KRT19 CDK7 LGALS2 CCND1 LYZ CXCR5 PHGDH KRT8 TPM2	10	-	-	LYZ KRT8	2	33.3333	0.03	-	-	-	-	-	-	-	-	-	-		LYZ	1	CD36 KRT19 CDK7 LGALS2 CCND1 LYZ CXCR5 PHGDH	8	LYZ	1	100		CCNB1 KIF23 KRT8 LAMA1 MYO10	5	KRT8 TPM2	2	KRT8	1	50
Tumor_PGR	Fibroblast	APOE CAPN13 CCNB1 CD24 CD36 CD68 CD69 CDK6 COL1A2 FAT1 FN1 FOS FOXP3 HIF1A HLA.B HSPB1 IGHG1 IGHG4 IGKC JUN KIF23 KRT19 LTF LYZ MDM2 MLPH MYL6 MYO10 PLVAP RPSA S100A8 SOX10 SOX4 SULF1 TPM2 XBP1 ZNF571	37	FOS APOE FOXP3 XCL1 TMSB4X FN1 TPM2 CDK6 HLA.B SULF1	10	-	-	FOS APOE FOXP3 FN1 TPM2 CDK6 HLA.B SULF1	8	80	0.01	-	-	-	-	-	-	-	-	-	-		APOE CD24 CD36 FOS FOXP3 HIF1A HSPB1 JUN KRT19 LTF LYZ MDM2 MLPH MYL6 RPSA SOX10 SOX4 XBP1 ZNF571	19	FOS APOE FOXP3 XCL1 TMSB4X	5	FOS APOE FOXP3	3	60		CAPN13 CCNB1 CD68 CD69 CDK6 COL1A2 FAT1 FN1 HLA.B IGHG1 IGHG4 IGKC KIF23 MYO10 PLVAP S100A8 TPM2	17	FN1 TPM2 CDK6 HLA.B	4	FN1 TPM2 CDK6 HLA.B	4	100
Tumor	Macrophage	ACTA2 CAPN13 CD74 FTL LYZ PECAM1 SDC1 TSPAN1 XBP1	9	CD14 APOE CD5 CLDN4 CD44 LGMN KRAS CAPN13 ICOS MZB1	10	-	-	CAPN13	1	11.1111	0.36	-	-	-	-	-	-	-	-	-	-		ACTA2 CD74 FTL LYZ SDC1 TSPAN1 XBP1	7	CD14 APOE CD5 CLDN4 CD44 LGMN KRAS	7	-	-	-		CAPN13 PECAM1	2	CAPN13 ICOS MZB1	3	CAPN13	1	50
Tumor_ALDH1A3	Macrophage	TSPAN1	1	-	-	-	-	-	-	-	-	-	-	-	-	-	-	-	-	-	-		TSPAN1	1	-	-	-	-	-		-	-	-	-	-	-	-
Tumor_EGFR	Macrophage	CDKN2A	1	-	-	-	-	-	-	-	-	-	-	-	-	-	-	-	-	-	-		CDKN2A	1	-	-	-	-	-		-	-	-	-	-	-	-
Tumor_EPCAM	Macrophage	NOTCH1	1	-	-	-	-	-	-	-	-	-	-	-	-	-	-	-	-	-	-		-	-	-	-	-	-	-		NOTCH1	1	-	-	-	-	-
Tumor_CD44	Macrophage	TFF1	1	-	-	-	-	-	-	-	-	-	-	-	-	-	-	-	-	-	-		TFF1	1	-	-	-	-	-		-	-	-	-	-	-	-
Tumor_PGR	Macrophage	CAPN13 DERL3 FOXP3 ISG20 XBP1	5	CD74 CD24 CD5 FTL RPSA APOE FOXP3 MLPH DERL3 S100A9	10	-	-	FOXP3 DERL3	2	40	0.04	-	-	-	-	-	-	-	-	-	-		DERL3 FOXP3 XBP1	3	CD74 CD24 CD5 FTL RPSA APOE FOXP3 MLPH DERL3 S100A9	10	FOXP3 DERL3	2	66.6667		CAPN13 ISG20	2	-	-	-	-	-
Tumor	Tcell	CD24 CD3G COL1A1 ERBB2 FASN FAT1 FCN1 FGFR4 FN1 HSPB1 IFITM3 IGHG1 IGHG4 IGKC KRT18 KRT19 KRT8 LST1 LTF LYZ MAPK3 MT2A MYL6 NOTCH1 RPL18 RPSA S100A14 S100A8 SDC1 SLC39A6 TFF1 TFF3 TFRC TMSB4X XBP1	35	KRT19 RPL18 CD36 MKI67 ERBB2 SLC39A6 LYZ FGFR1 HLA.B FN1	10	-	-	KRT19 RPL18 ERBB2 SLC39A6 LYZ FN1	6	60	0.01	-	-	-	-	-	-	-	-	-	-		CD24 ERBB2 FASN HSPB1 IFITM3 KRT18 KRT19 KRT8 LYZ MT2A MYL6 NOTCH1 RPL18 RPSA S100A14 SDC1 TFF1 TFF3 TFRC TMSB4X XBP1	21	KRT19 RPL18 MKI67 ERBB2 LYZ HLA.B	6	KRT19 RPL18 ERBB2 LYZ	4	66.6667		CD3G COL1A1 FAT1 FCN1 FGFR4 FN1 IGHG1 IGHG4 IGKC LST1 LTF MAPK3 S100A8 SLC39A6	14	CD36 SLC39A6 FGFR1 FN1	4	SLC39A6 FN1	2	50
Tumor_ALDH1A3	Tcell	CSTB ERBB2 FAT1 FCN1 FGFR4 IGHG1 IGHG4 IGKC KRT18 KRT19 LST1 LYZ MAPK3 PTTG1 S100A14 SLC39A6 SOX10 TFF1 TFF3 TMSB4X	20	AKT1 CCNB1 S100A14 HSPB1 KRT18 IGHG4 KRT19 HLA.A RPSA AGR2	10	-	-	S100A14 KRT18 IGHG4 KRT19	4	40	0.05	-	-	-	-	-	-	-	-	-	-		CSTB ERBB2 KRT18 KRT19 LYZ S100A14 SOX10 TFF1 TFF3 TMSB4X	10	AKT1 CCNB1 S100A14 HSPB1 KRT18 KRT19 HLA.A RPSA AGR2	9	S100A14 KRT18 KRT19	3	33.3333		FAT1 FCN1 FGFR4 IGHG1 IGHG4 IGKC LST1 MAPK3 PTTG1 SLC39A6	10	IGHG4	1	IGHG4	1	100
Tumor_EGFR	Tcell	COL1A2 COL3A1 COL4A1 FN1 SDC1	5	-	-	-	-	-	-	-	-	-	-	-	-	-	-	-	-	-	-		SDC1	1	-	-	-	-	-		COL1A2 COL3A1 COL4A1 FN1	4	-	-	-	-	-
Tumor_EPCAM	Tcell	APOE ERBB2 FASN HSPB1 KRT18 KRT19 MT2A MYL6 NOTCH1 RPSA TMSB4X	11	HSPB1 MDM2 CD24 NOTCH1 AZGP1 CD68 RPSA TIMP1 C1QA MYL6	10	-	-	HSPB1 NOTCH1 RPSA MYL6	4	40	0.01	-	-	-	-	-	-	-	-	-	-		APOE ERBB2 FASN HSPB1 KRT18 KRT19 MT2A MYL6 NOTCH1 RPSA TMSB4X	11	HSPB1 MDM2 CD24 NOTCH1 CD68 RPSA TIMP1 C1QA MYL6	9	HSPB1 NOTCH1 RPSA MYL6	4	44.4444		-	-	AZGP1	1	-	-	-
Tumor_CD44	Tcell	FOXP3 SDC1 TFF1	3	-	-	-	-	-	-	-	-	-	-	-	-	-	-	-	-	-	-		SDC1 TFF1	2	-	-	-	-	-		FOXP3	1	-	-	-	-	-
Tumor_PGR	Tcell	CD24 FASN FAT1 HSPB1 KRT18 KRT19 LST1 LYZ MAPK3 MT2A MYL6 S100A8 TMSB4X	13	LYZ MT2A CSTB KRT18 RPL18 TFF1 FXYD3 MMP11 ICOS CDH3	10	-	-	LYZ MT2A KRT18	3	30	0.02	-	-	-	-	-	-	-	-	-	-		CD24 FASN HSPB1 KRT18 KRT19 LYZ MT2A MYL6 TMSB4X	9	LYZ MT2A CSTB KRT18 RPL18 TFF1 FXYD3 CDH3	8	LYZ MT2A KRT18	3	37.5		FAT1 LST1 MAPK3 S100A8	4	MMP11 ICOS	2	-	-	-
Tumor	Tcell_CD3D	C1QA ERBB2 FABP7 FASN FAT1 FGFR4 GRB7 HSPB1 IFITM3 IGHG1 IGHG4 IGKC KRT18 KRT19 LYZ MAPK3 MDM2 MYL6 NOTCH1 S100A14 TMSB4X	21	LGALS1 FASN KRT18 TPM2 PBK CDH1 S100A14 STAT5A KRAS MAPK3	10	-	-	FASN KRT18 S100A14 MAPK3	4	40	0.01	-	-	-	-	-	-	-	-	-	-		ERBB2 FASN GRB7 HSPB1 IFITM3 KRT18 KRT19 LYZ MDM2 MYL6 NOTCH1 S100A14 TMSB4X	13	LGALS1 FASN KRT18 TPM2 PBK CDH1 S100A14 STAT5A	8	FASN KRT18 S100A14	3	37.5		C1QA FABP7 FAT1 FGFR4 IGHG1 IGHG4 IGKC MAPK3	8	KRAS MAPK3	2	MAPK3	1	50
Tumor_ALDH1A3	Tcell_CD3D	FAT1 FGFR4 GRB7 HSPB1 IFITM3 IGHG1 IGHG4 IGKC KRT18 MAPK3 MYL6 S100A14 SLC39A6	13	RAMP2 FCGR3A ACTR3B KRT18 BIRC5 HSPB1 CTCF LST1 CCNE2 TPM2	10	-	-	KRT18 HSPB1	2	20	0.06	-	-	-	-	-	-	-	-	-	-		GRB7 HSPB1 IFITM3 KRT18 MYL6 S100A14	6	RAMP2 FCGR3A ACTR3B KRT18 BIRC5 HSPB1 CTCF	7	KRT18 HSPB1	2	33.3333		FAT1 FGFR4 IGHG1 IGHG4 IGKC MAPK3 SLC39A6	7	LST1 CCNE2 TPM2	3	-	-	-
Tumor_EGFR	Tcell_CD3D	RRM2	1	-	-	-	-	-	-	-	-	-	-	-	-	-	-	-	-	-	-		RRM2	1	-	-	-	-	-		-	-	-	-	-	-	-
Tumor_EPCAM	Tcell_CD3D	CD68 CDKN2A COL3A1 GRB7 HSPB1 KRT18 NOTCH1 TFRC	8	-	-	-	-	-	-	-	-	-	-	-	-	-	-	-	-	-	-		CD68 CDKN2A GRB7 HSPB1 KRT18 NOTCH1 TFRC	7	-	-	-	-	-		COL3A1	1	-	-	-	-	-
Tumor_CD44	Tcell_CD3D	NOTCH1	1	-	-	-	-	-	-	-	-	-	-	-	-	-	-	-	-	-	-		NOTCH1	1	-	-	-	-	-		-	-	-	-	-	-	-
Tumor_PGR	Tcell_CD3D	CCND1 CD24 KRT18 KRT19 LYZ MDM2 TMSB4X	7	LYZ TTYH1 KRT19 MT2A FASN RPL18 HSPB1 BIRC5 STMN1 PTPRC	10	-	-	LYZ KRT19	2	28.5714	0.03	-	-	-	-	-	-	-	-	-	-		CCND1 CD24 KRT18 KRT19 LYZ MDM2 TMSB4X	7	LYZ TTYH1 KRT19 MT2A FASN RPL18 HSPB1 BIRC5	8	LYZ KRT19	2	28.5714		-	-	STMN1 PTPRC	2	-	-	-
Tumor	Tcell_CD4	FAT1 FN1 IGHG1 IGHG4 IGHM XCL1	6	-	-	-	-	-	-	-	-	-	-	-	-	-	-	-	-	-	-		IGHM XCL1	2	-	-	-	-	-		FAT1 FN1 IGHG1 IGHG4	4	-	-	-	-	-
Tumor_ALDH1A3	Tcell_CD4	FASN IGHG1	2	-	-	-	-	-	-	-	-	-	-	-	-	-	-	-	-	-	-		FASN	1	-	-	-	-	-		IGHG1	1	-	-	-	-	-
Tumor_EGFR	Tcell_CD4	-	-	-	-	-	-	-	-	-	-	-	-	-	-	-	-	-	-	-	-		-	-	-	-	-	-	-		-	-	-	-	-	-	-
Tumor_EPCAM	Tcell_CD4	APOE	1	-	-	-	-	-	-	-	-	-	-	-	-	-	-	-	-	-	-		APOE	1	-	-	-	-	-		-	-	-	-	-	-	-
Tumor_CD44	Tcell_CD4	ZNF571	1	-	-	-	-	-	-	-	-	-	-	-	-	-	-	-	-	-	-		ZNF571	1	-	-	-	-	-		-	-	-	-	-	-	-
Tumor_PGR	Tcell_CD4	CDK7 IGHM XCL1	3	-	-	-	-	-	-	-	-	-	-	-	-	-	-	-	-	-	-		CDK7 IGHM XCL1	3	-	-	-	-	-		-	-	-	-	-	-	-
Tumor	Tcell_CD8A	ACTA2 COL1A2 CSTB ERBB2 FASN FAT1 FGFR4 FN1 FOXP3 HSPB1 IFITM3 IGF1R IGHG1 IGHG4 KIF23 KRT18 KRT19 KRT8 LST1 LTF MAPK3 MT2A MYL6 MYO10 NKG7 PTPRC RPL18 RPSA RRM2 S100A14 SDC1 SULF1 TFEC TFF1 TFRC TMSB4X TTC6 XBP1	38	IFITM3 KRT19 TFRC TFF1 TMEM45B MYO5B GNG11 XBP1 HSPB1 SLC2A1	10	-	-	IFITM3 KRT19 TFRC TFF1 XBP1 HSPB1	6	60	0.01	-	-	-	-	-	-	-	-	-	-		ACTA2 CSTB ERBB2 FASN HSPB1 IFITM3 IGF1R KIF23 KRT18 KRT19 KRT8 MT2A MYL6 MYO10 NKG7 PTPRC RPL18 RPSA RRM2 S100A14 SDC1 TFEC TFF1 TFRC TMSB4X TTC6 XBP1	27	IFITM3 KRT19 TFRC TFF1 TMEM45B MYO5B GNG11 XBP1 HSPB1	9	IFITM3 KRT19 TFRC TFF1 XBP1 HSPB1	6	66.6667		COL1A2 FAT1 FGFR4 FN1 FOXP3 IGHG1 IGHG4 LST1 LTF MAPK3 SULF1	11	SLC2A1	1	-	-	-
Tumor_ALDH1A3	Tcell_CD8A	CSTB ERBB2 FAT1 IGHG1 IGHG4 KIF23 KRT19 KRT8 MYO10 PTTG1 SDC1 SLC39A6 TFEC TFRC TMSB4X TSPAN1 TTC6	17	-	-	-	-	-	-	-	-	-	-	-	-	-	-	-	-	-	-		CSTB ERBB2 KIF23 KRT19 KRT8 MYO10 SDC1 TFEC TFRC TMSB4X TSPAN1 TTC6	12	-	-	-	-	-		FAT1 IGHG1 IGHG4 PTTG1 SLC39A6	5	-	-	-	-	-
Tumor_EGFR	Tcell_CD8A	CD36 COL1A2 COL3A1 COL4A1 ERBB2 FASN FOS FOXP3 LTF PTPRC SDC1	11	CDK6 KRT19 PTPRC TTC6 MDM2 NKG7 TFF1 LAMA1 MAPK3 FOS	10	-	-	PTPRC FOS	2	20	0.24	-	-	-	-	-	-	-	-	-	-		ERBB2 FASN PTPRC SDC1	4	CDK6 KRT19 PTPRC TTC6 MDM2 NKG7 TFF1 LAMA1	8	PTPRC	1	25		CD36 COL1A2 COL3A1 COL4A1 FOS FOXP3 LTF	7	MAPK3 FOS	2	FOS	1	50
Tumor_EPCAM	Tcell_CD8A	CCNB1 CDK6 FASN HSPB1 IFITM3 KRT18 KRT19 KRT8 LILRB1 MT2A MYL6 RPSA STMN1 TFF1 TMSB4X XBP1	16	CCL3 HSPB1 MYO10 LGALS1 KRT18 STMN1 CEACAM1 NKG7 SFRP1 JUN	10	-	-	HSPB1 KRT18 STMN1	3	30	0.03	-	-	-	-	-	-	-	-	-	-		CCNB1 CDK6 FASN HSPB1 IFITM3 KRT18 KRT19 KRT8 LILRB1 MT2A MYL6 RPSA STMN1 TFF1 TMSB4X XBP1	16	CCL3 HSPB1 MYO10 LGALS1 KRT18 STMN1 CEACAM1 NKG7 SFRP1	9	HSPB1 KRT18 STMN1	3	33.3333		-	-	JUN	1	-	-	-
Tumor_CD44	Tcell_CD8A	FOXP3 SDC1 TFF1	3	-	-	-	-	-	-	-	-	-	-	-	-	-	-	-	-	-	-		SDC1 TFF1	2	-	-	-	-	-		FOXP3	1	-	-	-	-	-
Tumor_PGR	Tcell_CD8A	FAT1 FN1 HSPB1 MT2A POU2AF1	5	-	-	-	-	-	-	-	-	-	-	-	-	-	-	-	-	-	-		HSPB1 MT2A POU2AF1	3	-	-	-	-	-		FAT1 FN1	2	-	-	-	-	-
Tumor	Not Tumor	APOE CD24 CD69 ERBB2 FGFR4 FN1 FOXP3 FTL HSPB1 IFITM3 IGHG1 IGHG4 IGKC KIF23 KRT18 KRT19 LST1 LYZ MLPH RPSA TMSB4X XBP1	22	-	-	GEP18: TPM2 CD69 LAMA1 CD79B MYO10 IL2RA PLVAP CAPN13 KRT8 KIF23 PGR TMEM45B GNG11 RB1 C1QA	15	-	-	-	-	CD69 KIF23	2	13.3333	0.7	-	-	-	-	-	-		APOE CD24 ERBB2 FGFR4 FOXP3 FTL HSPB1 IFITM3 IGHG1 IGHG4 IGKC KRT18 KRT19 LST1 LYZ MLPH RPSA TMSB4X XBP1	19	-	-	-	-	-		CD69 FN1 KIF23	3	-	-	-	-	-
			862		330		0		166				0				0				0			525		202		79				294		95		56
1- upregulated genes without marker genes as mentioned in the "Materials and Methods" section.

## Sheet: Filter2-p-value 1e-5
		Upregulated+Downregulated Genes										Upregulated+Downregulated Genes
Cell Type X	Cell Type Y	DE [names]	DE [number]	DE [names]- after removing filtered genes (column X)	DE [number]	High DE: genes from column C with p-value lower than 1e-5	number			Cell Type X	Cell Type Y	DE [names]	DE [number]	DE [names]- after removing filtered genes (column V)	DE [number]	High DE: genes from column M with p-value lower than 1e-5	number				Filtered genes: genes that appear both in column M and column G	number	Filtered genes: genes that appear both in column Q and column C	number
Bcell	Tumor	APOE CCND1 CD68 CD74 CDKN2A COL1A1 COL1A2 COL3A1 COL4A1 CST3 FGFR1 FTL GATA3 HLA.A HLA.B KRT18 KRT19 LYZ MT2A MYL6 SNAI2 SULF1 TIMP1 TMSB4X TSPAN1	25	APOE CCND1 CD68 CD74 CDKN2A COL3A1 COL4A1 CST3 FGFR1 GATA3 HLA.A MT2A MYL6 SNAI2 SULF1 TIMP1 TMSB4X TSPAN1	18	TMSB4X	1			Tumor	Bcell	ACTA2 AHR AZGP1 BGN CCNB1 CCNE2 CD24 CD38 CD68 CD69 CD74 CDKN2A COL1A1 COL1A2 COL3A1 COL4A1 COL4A2 CST3 DERL3 FASN FAT1 FCN1 FGFR4 FN1 FOS FOXP3 FTL GNG11 GRB7 HIF1A HLA.B HSPB1 IFITM3 IGHG1 IGHG4 IGKC ISG20 KIF23 KRT18 KRT19 LAMA1 LST1 LTF LYZ MAPK3 MDM2 MYL6 MYO10 NDC80 PGR PLVAP PTTG1 RPSA S100A8 SLC39A6 SNAI2 SOX10 SULF1 TCL1A TFF1 TIMP1 TPM2 TRAC XBP1 ZNF571	65	ACTA2 AHR AZGP1 BGN CCNB1 CCNE2 CD24 CD38 CD68 CD69 CD74 CDKN2A COL1A1 COL1A2 COL3A1 COL4A1 COL4A2 CST3 DERL3 FASN FAT1 FCN1 FGFR4 FN1 FOS FOXP3 FTL GNG11 GRB7 HIF1A HLA.B HSPB1 IFITM3 IGHG1 IGHG4 IGKC ISG20 KIF23 KRT18 KRT19 LAMA1 LST1 LTF LYZ MAPK3 MDM2 MYL6 MYO10 NDC80 PGR PLVAP PTTG1 RPSA S100A8 SLC39A6 SNAI2 SOX10 SULF1 TCL1A TFF1 TIMP1 TPM2 TRAC XBP1 ZNF571	65	COL1A1 COL1A2 FAT1 FCN1 FGFR4 FN1 FTL GNG11 HIF1A HLA.B HSPB1 IGHG1 IGHG4 IGKC KRT18 KRT19 LST1 LYZ MAPK3 RPSA S100A8 SLC39A6 TFF1 TPM2 TRAC	25				-	0	COL1A1 COL1A2 FTL HLA.B KRT18 KRT19 LYZ	7
Bcell	Tumor_ALDH1A3	AHR CD19 FABP7 FCN1 FCRL5 FGFR4 KRT17 LTF MLPH MT2A SLC39A6 SPDEF TRAC TSPAN1 TYMS	15	AHR CD19 FABP7 FCRL5 KRT17 LTF MLPH MT2A SPDEF TRAC TSPAN1 TYMS	12	-	0			Tumor_ALDH1A3	Bcell	CCNE2 CD19 CD24 CD74 CDK4 CDKN2A FAT1 FCN1 FGFR4 FOS FOXP3 GRB7 HIF1A HSPB1 HSPG2 ICOS IFITM3 IGHG1 IGHG4 IGKC KRT19 LST1 LTF LYZ MAPK3 MYO10 PTTG1 RPSA S100A8 SLC39A6 SOX10 SULF1 TFF1 TRAC XBP1	35	CCNE2 CD19 CD24 CD74 CDK4 CDKN2A FAT1 FCN1 FGFR4 FOS FOXP3 GRB7 HIF1A HSPB1 HSPG2 ICOS IFITM3 IGHG1 IGHG4 IGKC KRT19 LST1 LTF LYZ MAPK3 MYO10 PTTG1 RPSA S100A8 SLC39A6 SOX10 SULF1 TFF1 TRAC XBP1	35	FAT1 FCN1 FGFR4 IGHG1 IGHG4 IGKC KRT19 LST1 LYZ MAPK3 S100A8 SLC39A6 TFF1	13				-	0	FCN1 FGFR4 SLC39A6	3
Bcell	Tumor_EGFR	ACTA2 ANLN APOE BGN BICC1 C1QA CD19 CD74 CDK4 COL1A1 COL1A2 COL3A1 COL4A1 COL4A2 CTSL FGFR1 FN1 GNG11 HLA.A HLA.B HLA.DRB1 ISG15 KIF23 KRT17 MLPH MMP11 MT2A MYB MYL6 PTEN SNAI2 TCF4 TIMP1 TMSB4X TTC6	35	ACTA2 ANLN APOE BGN BICC1 C1QA CD19 CD74 CDK4 COL1A1 COL1A2 COL3A1 COL4A1 COL4A2 CTSL FGFR1 FN1 HLA.A HLA.B HLA.DRB1 ISG15 KIF23 KRT17 MLPH MMP11 MT2A MYB MYL6 PTEN SNAI2 TCF4 TIMP1 TMSB4X TTC6	34	COL1A1 COL4A1 COL4A2 FGFR1 FN1 TIMP1	6			Tumor_EGFR	Bcell	ANLN BCL2 C1QA CD38 CD69 COL1A1 COL1A2 COL4A1 COL4A2 CST3 FN1 FOXP3 GNG11 HIF1A HLA.B IGHG1 IGHG4 IGKC KIF23 LYZ MYO10 PLVAP SULF1 TIMP1	24	ANLN BCL2 C1QA CD38 CD69 COL1A2 CST3 FOXP3 GNG11 HIF1A HLA.B IGHG1 IGHG4 IGKC KIF23 LYZ MYO10 PLVAP SULF1	19	GNG11	1				COL1A1 COL4A1 COL4A2 FN1 TIMP1	5	GNG11	1
Bcell	Tumor_EPCAM	FAT1 FTL IGKC TFF1	4	FAT1 FTL IGKC TFF1	4	-	0			Tumor_EPCAM	Bcell	COL4A1 COL4A2 FN1 GRB7 HIF1A IGHG1 KRT18 KRT19	8	COL4A1 COL4A2 FN1 GRB7 HIF1A IGHG1 KRT18 KRT19	8	-	0				-	0	-	0
Bcell	Tumor_CD44	FAT1 FGFR4 IGHG1 IGHG4 LST1	5	FAT1 FGFR4 IGHG1 IGHG4 LST1	5	-	0			Tumor_CD44	Bcell	FN1 GNG11 HLA.B KIF23 KRT19 LAMA1 PLVAP TFF1 TPM2	9	FN1 GNG11 HLA.B KIF23 KRT19 LAMA1 PLVAP TFF1 TPM2	9	-	0				-	0	-	0
Bcell	Tumor_PGR	CD68 CD69 CD74 CDK7 CDKN2A CST3 FGFR1 FTL GATA3 GNG11 HLA.B KIF23 MYL9 PTTG1 SNAI2 TIMP1 TPM2	17	CD68 CD69 CD74 CDK7 CDKN2A CST3 FGFR1 FTL GATA3 GNG11 HLA.B KIF23 MYL9 PTTG1 SNAI2 TIMP1 TPM2	17	-	0			Tumor_PGR	Bcell	AHR AZGP1 CCNE2 CD24 CD68 COL1A1 FAT1 FGFR4 FOS FTL GRB7 HIF1A HLA.B HSPB1 IGHG1 IGHG4 IGHM IGKC ISG20 KRT18 KRT19 LST1 LYZ MAPK3 MDM2 PGR RPSA S100A8 SLC39A6 SNAI2 TFF1 TPM2 XBP1	33	AHR AZGP1 CCNE2 CD24 CD68 COL1A1 FAT1 FGFR4 FOS FTL GRB7 HIF1A HLA.B HSPB1 IGHG1 IGHG4 IGHM IGKC ISG20 KRT18 KRT19 LST1 LYZ MAPK3 MDM2 PGR RPSA S100A8 SLC39A6 SNAI2 TFF1 TPM2 XBP1	33	FAT1 FGFR4 IGHG1 IGHG4 IGKC KRT19 LST1 S100A8	8				-	0	-	0
Bcell_IGHG1	Tumor	APOE CCNB1 CD74 CST3 HLA.B	5	APOE CCNB1 CD74 CST3 HLA.B	5	-	0			Tumor	Bcell_IGHG1	AHR CCNB1 CCNE2 CD19 CD24 CD38 CD74 COL1A1 COL1A2 COL3A1 CST3 CSTB DERL3 FAT1 FCN1 FGFR4 FOS FOXP3 FTL GNG11 HIF1A HLA.B HSPB1 IGHG1 IGHG4 IGKC KRT19 LST1 LTF LYZ MAPK3 NDC80 PGR PTTG1 RPSA S100A8 SLC39A6 SNAI2 SOX10 TFF1 TPM2 TRAC ZNF571	43	AHR CCNB1 CCNE2 CD19 CD24 CD38 CD74 COL1A1 COL1A2 COL3A1 CST3 CSTB DERL3 FAT1 FCN1 FGFR4 FOS FOXP3 FTL GNG11 HIF1A HLA.B HSPB1 IGHG1 IGHG4 IGKC KRT19 LST1 LTF LYZ MAPK3 NDC80 PGR PTTG1 RPSA S100A8 SLC39A6 SNAI2 SOX10 TFF1 TPM2 TRAC ZNF571	43	CCNE2 COL1A1 FAT1 FCN1 FGFR4 FTL HIF1A IGHG1 IGHG4 IGKC KRT19 LST1 LTF MAPK3 PTTG1 S100A8 SLC39A6 TFF1 TPM2 TRAC	20				-	0	-	0
Bcell_IGHG1	Tumor_ALDH1A3	CD69 FCGR3A LTF TSPAN1	4	CD69 FCGR3A LTF TSPAN1	4		0			Tumor_ALDH1A3	Bcell_IGHG1	CCNE2 CD19 CD24 COL4A1 CSTB FAT1 FCN1 FGFR4 FOS FOXP3 FTL GRB7 HIF1A IGHG1 IGHG4 IGKC KRT19 LST1 LYZ MAPK3 MYO10 PLVAP PTTG1 S100A8 SDC1 SLC39A6 SULF1 TFF1 TRAC	29	CCNE2 CD19 CD24 COL4A1 CSTB FAT1 FCN1 FGFR4 FOS FOXP3 FTL GRB7 HIF1A IGHG1 IGHG4 IGKC KRT19 LST1 LYZ MAPK3 MYO10 PLVAP PTTG1 S100A8 SDC1 SLC39A6 SULF1 TFF1 TRAC	29	FAT1 FCN1 FGFR4 IGHG1 IGHG4 IGKC S100A8 SLC39A6	8				-	0	-	0
Bcell_IGHG1	Tumor_EGFR	APOE CD19 KRT17 KRT19 MYL6 TTC6	6	APOE CD19 KRT17 KRT19 MYL6 TTC6	6	-	0			Tumor_EGFR	Bcell_IGHG1	ANLN CD69 COL1A2 CSTB FAT1 FN1 HIF1A HLA.B IGHG1 IGHG4 IGKC KRT19	12	ANLN CD69 COL1A2 CSTB FAT1 FN1 HIF1A HLA.B IGHG1 IGHG4 IGKC KRT19	12	-	0				-	0	-	0
Bcell_IGHG1	Tumor_EPCAM	-	-		0		0			Tumor_EPCAM	Bcell_IGHG1	-	-		0	-	0				-	0	-	0
Bcell_IGHG1	Tumor_CD44	-	-		0		0			Tumor_CD44	Bcell_IGHG1	COL1A1 COL1A2 FN1 TPM2	4	COL1A1 COL1A2 FN1 TPM2	4	-	0				-	0	-	0
Bcell_IGHG1	Tumor_PGR	APOE CCNB1 CD68 CD74 COL3A1 CST3 ISG20 MYL9 SNAI2 TIMP1 TPM2	11	APOE CCNB1 CD68 CD74 COL3A1 CST3 ISG20 MYL9 SNAI2 TIMP1 TPM2	11	-	0			Tumor_PGR	Bcell_IGHG1	AHR AZGP1 CCNB1 CCNE2 CD24 CST3 CTSL DERL3 FAT1 FCN1 FGFR4 FOS FTL GRB7 HIF1A HLA.B IGHG1 IGHG4 IGKC KRT19 LST1 LYPD6B LYZ MAPK3 PECAM1 PGR PTTG1 S100A8 SLC39A6 TFF1 TPM2 TRAC TSPAN1	33	AHR AZGP1 CCNB1 CCNE2 CD24 CST3 CTSL DERL3 FAT1 FCN1 FGFR4 FOS FTL GRB7 HIF1A HLA.B IGHG1 IGHG4 IGKC KRT19 LST1 LYPD6B LYZ MAPK3 PECAM1 PGR PTTG1 S100A8 SLC39A6 TFF1 TPM2 TRAC TSPAN1	33	FAT1 FGFR4 FTL IGHG1 IGHG4 IGKC LST1 S100A8 SLC39A6	9				-	0	-	0
Bcell_IGKC	Tumor	ACTA2 CDKN2A COL1A1 COL1A2 COL3A1 COL4A1 COL4A2 FAT1 FGFR1 GATA3 LYZ MYL6 PTTG1 SNAI2 SULF1 TMSB4X TYMS	17	ACTA2 CDKN2A COL3A1 COL4A1 COL4A2 FGFR1 GATA3 MYL6 PTTG1 SNAI2 SULF1 TMSB4X TYMS	13	-	0			Tumor	Bcell_IGKC	ACTA2 C1QA CCNE2 CD24 CD38 CD3G CD68 CD69 CDKN2A COL1A1 COL1A2 COL3A1 COL4A1 COL4A2 CST3 FASN FAT1 FCN1 FGFR1 FGFR4 FN1 FOS FOXP3 GNG11 GRB7 HIF1A HLA.B HSPB1 IFITM3 IGHG1 IGHG4 IGKC KIF23 KRT18 KRT19 LAMA1 LST1 LYZ MAPK3 MDM2 MYL6 MYO10 PGR PLVAP PTTG1 RPSA S100A8 SLC39A6 SNAI2 SOX10 SULF1 TFF1 TIMP1 TPM2 TRAC XBP1 ZNF571	57	ACTA2 C1QA CCNE2 CD24 CD38 CD3G CD68 CD69 CDKN2A COL1A1 COL1A2 COL3A1 COL4A1 COL4A2 CST3 FASN FAT1 FCN1 FGFR1 FGFR4 FN1 FOS FOXP3 GNG11 GRB7 HIF1A HLA.B HSPB1 IFITM3 IGHG1 IGHG4 IGKC KIF23 KRT18 KRT19 LAMA1 LST1 LYZ MAPK3 MDM2 MYL6 MYO10 PGR PLVAP PTTG1 RPSA S100A8 SLC39A6 SNAI2 SOX10 SULF1 TFF1 TIMP1 TPM2 TRAC XBP1 ZNF571	57	COL1A1 COL1A2 FAT1 FGFR4 FN1 GNG11 HIF1A HLA.B IGHG1 IGHG4 IGKC KRT19 LST1 LYZ MAPK3 RPSA S100A8 SLC39A6 TFF1 TPM2	20				-	0	COL1A1 COL1A2 FAT1 LYZ	4
Bcell_IGKC	Tumor_ALDH1A3	CD19 FGFR4 MT2A SLC39A6 SPDEF TYMS	6	CD19 FGFR4 MT2A SPDEF TYMS	5	-	0			Tumor_ALDH1A3	Bcell_IGKC	CD24 CD3G CDK4 CDKN2A FAT1 FCN1 FGFR4 FOS FOXP3 HIF1A HSPB1 HSPG2 IGHG1 IGHG4 IGKC KRT19 LST1 LYZ MAPK3 MDM2 MYL6 MYO10 PTTG1 RPSA S100A8 SLC39A6 SOX10 SULF1 TFF1 TRAC	30	CD24 CD3G CDK4 CDKN2A FAT1 FCN1 FGFR4 FOS FOXP3 HIF1A HSPB1 HSPG2 IGHG1 IGHG4 IGKC KRT19 LST1 LYZ MAPK3 MDM2 MYL6 MYO10 PTTG1 RPSA S100A8 SLC39A6 SOX10 SULF1 TFF1 TRAC	30	CD24 IGKC LYZ S100A8 SLC39A6	5				-	0	SLC39A6	1
Bcell_IGKC	Tumor_EGFR	ANLN BGN C1QA CD38 CD74 CDK4 COL1A1 COL1A2 COL3A1 COL4A1 COL4A2 CTSL FAT1 FGFR1 FGFR4 FN1 HLA.B ISG15 KIT LST1 MAPK3 MLPH MMP11 MT2A MYL6 PTEN SNAI2 TAGLN TFF2 TIMP1 TMSB4X	31	ANLN BGN C1QA CD38 CD74 CDK4 COL1A1 COL1A2 COL3A1 COL4A1 COL4A2 CTSL FAT1 FGFR1 FGFR4 FN1 HLA.B ISG15 KIT LST1 MAPK3 MLPH MMP11 MT2A MYL6 PTEN SNAI2 TAGLN TFF2 TIMP1 TMSB4X	31	COL1A1 COL1A2 COL4A1 COL4A2 FGFR1 FN1	6			Tumor_EGFR	Bcell_IGKC	ACTA2 ANLN BCL2 C1QA CD38 CD69 CDK4 COL1A1 COL1A2 COL4A1 COL4A2 FGFR1 FN1 FOXP3 GNG11 GRB7 HIF1A HLA.B IGHG1 IGKC MYO10 PLVAP TAGLN TIMP1 TPM2	25	ACTA2 ANLN BCL2 C1QA CD38 CD69 CDK4 FOXP3 GNG11 GRB7 HIF1A HLA.B IGHG1 IGKC MYO10 PLVAP TAGLN TIMP1 TPM2	19	GNG11	1				COL1A1 COL1A2 COL4A1 COL4A2 FGFR1 FN1	6	-	0
Bcell_IGKC	Tumor_EPCAM	FAT1 IGKC KRT19 TFF1	4	FAT1 IGKC KRT19 TFF1	4	-	0			Tumor_EPCAM	Bcell_IGKC	COL4A1 COL4A2 FN1 GRB7 HIF1A IGHG1 KRT18 KRT19	8	COL4A1 COL4A2 FN1 GRB7 HIF1A IGHG1 KRT18 KRT19	8	-	0				-	0	-	0
Bcell_IGKC	Tumor_CD44	FAT1 IGHG4	2	FAT1 IGHG4	2		0			Tumor_CD44	Bcell_IGKC	CCNE1 GNG11 HLA-B KIF23 PLVAP TCF4 TCL1A KRT19 TFF1	9	CCNE1 GNG11 HLA-B KIF23 PLVAP TCF4 TCL1A KRT19 TFF1	9	-	0				-	0	-	0
Bcell_IGKC	Tumor_PGR	ACTA2 CD68 CD69 CDK7 CDKN2A FGFR1 FOS FTL GATA3 GNG11 HIF1A KIF23 PTTG1 S100A9 SNAI2 TPM2	16	ACTA2 CD68 CD69 CDK7 CDKN2A FGFR1 FOS FTL GATA3 GNG11 HIF1A KIF23 PTTG1 S100A9 SNAI2 TPM2	16	-	0			Tumor_PGR	Bcell_IGKC	AZGP1 CCNE2 CD68 COL1A1 COL1A2 FAT1 FGFR4 FOS GRB7 HIF1A HLA.B HSPB1 IGHG1 IGHG4 IGKC KRT19 LST1 LYZ MAPK3 MDM2 RPSA S100A8 SNAI2 TFF1 TPM2 XBP1	26	AZGP1 CCNE2 CD68 COL1A1 COL1A2 FAT1 FGFR4 FOS GRB7 HIF1A HLA.B HSPB1 IGHG1 IGHG4 IGKC KRT19 LST1 LYZ MAPK3 MDM2 RPSA S100A8 SNAI2 TFF1 TPM2 XBP1	26	FAT1 IGHG1 IGHG4 IGKC KRT19 S100A8	6				-	0	-	0
Fibroblast	Tumor	CD3G KRT18 MYL6 RPSA SULF1 TMSB4X TSPAN1	7	KRT18 MYL6 TMSB4X TSPAN1	4	-	0			Tumor	Fibroblast	APOE BGN C1QA CCNB1 CD24 CD36 CD3G CD68 CD69 CD79B CDK6 CDKN2A COL1A1 COL1A2 CRABP2 CTSL ERBB2 FAT1 FN1 FOS FOXP3 GNG11 GZMB HIF1A HLA.B HSPB1 ICOS IFITM3 IGHG1 IGHG4 IGKC IL2RA JUN KIF23 KRT8 KRT18 KRT19 LAMA1 LYZ MDM2 MLPH MYL6 MYO10 NOTCH1 PABPC1 PGR PLVAP RPSA S100A8 SDC1 SOX10 SOX4 SULF1 TFF1 THY1 TPM2 TTC6 XBP1 ZNF571	59	APOE BGN C1QA CCNB1 CD24 CD36 CD3G CD68 CD69 CD79B CDK6 CDKN2A COL1A1 COL1A2 CRABP2 CTSL ERBB2 FAT1 FN1 FOS FOXP3 GNG11 GZMB HIF1A HLA.B HSPB1 ICOS IFITM3 IGHG1 IGHG4 IGKC IL2RA JUN KIF23 KRT8 KRT18 KRT19 LAMA1 LYZ MDM2 MLPH MYL6 MYO10 NOTCH1 PABPC1 PGR PLVAP RPSA S100A8 SDC1 SOX10 SOX4 SULF1 TFF1 THY1 TPM2 TTC6 XBP1 ZNF571	59	APOE CCNB1 CD24 CD3G CD68 CD69 CDKN2A FAT1 FN1 FOS FOXP3 GNG11 ICOS IGHG1 IGHG4 IGKC JUN KIF23 KRT19 LAMA1 LYZ MDM2 MLPH MYO10 PLVAP RPSA SULF1 TPM2 XBP1	29				-	0	CD3G RPSA SULF1	3
Fibroblast	Tumor_ALDH1A3	CD24 CTSL ERBB2 FTL KIT KRT18 KRT19 LYZ MAPK3 PABPC1 PTPRC RPL18 RPSA SNAI2 STAT5A TFF3 TSPAN1 XBP1	18	CD24 CTSL ERBB2 FTL KIT KRT18 KRT19 LYZ MAPK3 PABPC1 PTPRC RPL18 RPSA SNAI2 STAT5A TFF3 TSPAN1 XBP1	18	-	0			Tumor_ALDH1A3	Fibroblast	APOE C1QA CCNB1 CD24 CD36 CD3E CTSL FASN FAT1 FCN1 FGFR4 FOS FOXP3 GRB7 ICOS IGHG1 IGHG4 IGKC LST1 LYZ MAPK3 MDM2 MLPH PTTG1 RPSA S100A8 SLC39A6 SOX10 SULF1	29	APOE C1QA CCNB1 CD24 CD36 CD3E CTSL FASN FAT1 FCN1 FGFR4 FOS FOXP3 GRB7 ICOS IGHG1 IGHG4 IGKC LST1 LYZ MAPK3 MDM2 MLPH PTTG1 RPSA S100A8 SLC39A6 SOX10 SULF1	29	FAT1 IGHG1 IGHG4 IGKC	4				-	0	-	0
Fibroblast	Tumor_EGFR	ACTA2 CSTB ICOS KIF23 LTF SDC1	6	ACTA2 CSTB ICOS KIF23 LTF SDC1	6	-	0			Tumor_EGFR	Fibroblast	APOE FOS FOXP3 GNG11 KIF23 LTF MYO10 PTPRC SULF1	9	APOE FOS FOXP3 GNG11 KIF23 LTF MYO10 PTPRC SULF1	9	-	0				-	0	-	0
Fibroblast	Tumor_EPCAM	CD3G HIF1A HSPG2 JUN LAMA1 MMP11 MYL6 POU2AF1 SKAP1 SULF1	10	CD3G HIF1A HSPG2 JUN LAMA1 MMP11 MYL6 POU2AF1 SKAP1 SULF1	10	SULF1	1			Tumor_EPCAM	Fibroblast	CCNB1 CD69 CDKN2A FABP7 FAP HSPG2 KIF23 LAMA1 LYZ NOTCH1 PECAM1 SKAP1 XBP1	13	CCNB1 CD69 CDKN2A FABP7 FAP HSPG2 KIF23 LAMA1 LYZ NOTCH1 PECAM1 SKAP1 XBP1	13	-	0				-	0	-	0
Fibroblast	Tumor_CD44	-	-		0		0			Tumor_CD44	Fibroblast	CCNB1 KIF23 KRT8 LAMA1 LYZ MYO10	6	CCNB1 KIF23 KRT8 LAMA1 LYZ MYO10	6	-	0				-	0	-	0
Fibroblast	Tumor_PGR	CD3G SDC1	2	CD3G SDC1	2		0			Tumor_PGR	Fibroblast	APOE CAPN13 CCNB1 CD24 CD36 CD68 CD69 CDK6 COL1A2 FAT1 FN1 FOS FOXP3 HIF1A HLA.B HSPB1 IGHG1 IGHG4 IGKC JUN KIF23 KRT19 LTF LYZ MDM2 MLPH MYL6 MYO10 PLVAP RPSA S100A8 SOX10 SOX4 SULF1 TPM2 XBP1 ZNF571	37	APOE CAPN13 CCNB1 CD24 CD36 CD68 CD69 CDK6 COL1A2 FAT1 FN1 FOS FOXP3 HIF1A HLA.B HSPB1 IGHG1 IGHG4 IGKC JUN KIF23 KRT19 LTF LYZ MDM2 MLPH MYL6 MYO10 PLVAP RPSA S100A8 SOX10 SOX4 SULF1 TPM2 XBP1 ZNF571	37	APOE CD68 FN1 FOS FOXP3 SULF1 TPM2	7				-	0	-	0
Macrophage	Tumor	CD24 FGFR4 FN1 HIF1A IGHG1 IGKC KRT19 LYZ TFF1	9	CD24 FGFR4 FN1 HIF1A IGHG1 IGKC KRT19 LYZ TFF1	9	-	0			Tumor	Macrophage	ACTA2 CAPN13 CD74 FTL LYZ PECAM1 SDC1 TSPAN1 XBP1	9	ACTA2 CAPN13 CD74 FTL LYZ PECAM1 SDC1 TSPAN1 XBP1	9	-	0				-	0	-	0
Macrophage	Tumor_ALDH1A3	FN1 IGHG1	2	FN1 IGHG1	2		0			Tumor_ALDH1A3	Macrophage	TSPAN1	1	TSPAN1	1		0				-	0	-	0
Macrophage	Tumor_EGFR	-	-		0		0			Tumor_EGFR	Macrophage	CDKN2A	1	CDKN2A	1		0				-	0	-	0
Macrophage	Tumor_EPCAM	APOE CD24 FAT1 FN1 HLA.B IGHG1 IGHG4 IGKC KRT19 LYZ MAPK3 XBP1	12	APOE CD24 FAT1 FN1 HLA.B IGHG1 IGHG4 IGKC KRT19 LYZ MAPK3 XBP1	12	IGHG1 IGHG4	2			Tumor_EPCAM	Macrophage	NOTCH1	1	NOTCH1	1		0				-	0	-	0
Macrophage	Tumor_CD44	CD24 FAT1 IGHG1 IGHG4 IL7R KRT18 KRT19 LYZ RPSA TFF1	10	CD24 FAT1 IGHG1 IGHG4 IL7R KRT18 KRT19 LYZ RPSA TFF1	10	-	0			Tumor_CD44	Macrophage	TFF1	1	TFF1	1		0				-	0	-	0
Macrophage	Tumor_PGR	CDKN2A SULF1	2	CDKN2A SULF1	2	-	0			Tumor_PGR	Macrophage	CAPN13 DERL3 FOXP3 ISG20 XBP1	5	CAPN13 DERL3 FOXP3 ISG20 XBP1	5	-	0				-	0	-	0
Tcell	Tumor	C1QA CD24 CD3G CD63 EPCAM FASN FTL HSPG2 KRT18 KRT8 LAMA1 LYZ MYL6 PLVAP RPSA S100A14 SDC1 TFF1 TMSB4X	19	C1QA CD24 CD3G CD63 EPCAM FTL HSPG2 KRT8 LAMA1 LYZ MYL6 PLVAP RPSA S100A14 SDC1 TFF1	16	TMSB4X	1			Tumor	Tcell	CD24 CD3G COL1A1 ERBB2 FASN FAT1 FCN1 FGFR4 FN1 HSPB1 IFITM3 IGHG1 IGHG4 IGKC KRT18 KRT19 KRT8 LST1 LTF LYZ MAPK3 MT2A MYL6 NOTCH1 RPL18 RPSA S100A14 S100A8 SDC1 SLC39A6 TFF1 TFF3 TFRC TMSB4X XBP1	35	CD24 CD3G COL1A1 ERBB2 FASN FAT1 FCN1 FGFR4 FN1 HSPB1 IFITM3 IGHG1 IGHG4 IGKC KRT18 KRT19 KRT8 LST1 LTF LYZ MAPK3 MT2A MYL6 NOTCH1 RPL18 RPSA S100A14 S100A8 SDC1 SLC39A6 TFF1 TFF3 TFRC XBP1	34	ERBB2 FASN FAT1 FGFR4 FN1 HSPB1 IGHG1 IGHG4 KRT18 KRT19 TMSB4X	11				TMSB4X	1	FASN KRT18 TMSB4X	3
Tcell	Tumor_ALDH1A3	BICC1 CD69 CTSL FAP FN1 FOXP3 JUN LAMA1 MLPH	9	BICC1 CD69 CTSL FAP FN1 FOXP3 JUN LAMA1 MLPH	9	-	0			Tumor_ALDH1A3	Tcell	CSTB ERBB2 FAT1 FCN1 FGFR4 IGHG1 IGHG4 IGKC KRT18 KRT19 LST1 LYZ MAPK3 PTTG1 S100A14 SLC39A6 SOX10 TFF1 TFF3 TMSB4X	20	CSTB ERBB2 FAT1 FCN1 FGFR4 IGHG1 IGHG4 IGKC KRT18 KRT19 LST1 LYZ MAPK3 PTTG1 S100A14 SLC39A6 SOX10 TFF1 TFF3 TMSB4X	20	FAT1 IGHG1 IGHG4	3				-	0	-	0
Tcell	Tumor_EGFR	CD24 CTSL FTL GNG11 KIF23 LGALS2 LYZ SDC1 SOX10 TFRC ZNF571	11	CD24 CTSL FTL GNG11 KIF23 LGALS2 LYZ SDC1 SOX10 TFRC ZNF571	11	-	0			Tumor_EGFR	Tcell	COL1A2 COL3A1 COL4A1 FN1 SDC1	5	COL1A2 COL3A1 COL4A1 FN1 SDC1	5	-	0				-	0	-	0
Tcell	Tumor_EPCAM	APOE CD3G CDK4 CDK6 EPCAM FASN GATA3 HSPG2 IGHG1 JUN KRAS KRT18 KRT19 LAMA1 MLPH MYL6 PTPRB RPSA S100A14 SULF1 TFF1 THY1 TMSB4X	23	APOE CD3G CDK4 CDK6 EPCAM FASN GATA3 HSPG2 IGHG1 JUN KRAS KRT18 KRT19 LAMA1 MLPH MYL6 PTPRB RPSA S100A14 SULF1 TFF1 THY1 TMSB4X	23	LAMA1 TFF1	2			Tumor_EPCAM	Tcell	APOE ERBB2 FASN HSPB1 KRT18 KRT19 MT2A MYL6 NOTCH1 RPSA TMSB4X	11	APOE ERBB2 FASN HSPB1 KRT18 KRT19 MT2A MYL6 NOTCH1 RPSA TMSB4X	11	-	0				-	0	-	0
Tcell	Tumor_CD44	ANLN C1QA SDC1 TFF1 TFF2 TMSB4X	6	ANLN C1QA SDC1 TFF1 TFF2 TMSB4X	6	SDC1 TFF2	2			Tumor_CD44	Tcell	FOXP3 SDC1 TFF1	3	FOXP3 TFF1	2	-	0				SDC1	1	-	0
Tcell	Tumor_PGR	C1QA CD69 CD74 HLA.B KRT8 LAMA1 PLVAP PTPRC RPSA TFRC TPM2	11	C1QA CD69 CD74 HLA.B KRT8 LAMA1 PLVAP PTPRC RPSA TFRC TPM2	11	-	0			Tumor_PGR	Tcell	CD24 FASN FAT1 HSPB1 KRT18 KRT19 LST1 LYZ MAPK3 MT2A MYL6 S100A8 TMSB4X	13	CD24 FASN FAT1 HSPB1 KRT18 KRT19 LST1 LYZ MAPK3 MT2A MYL6 S100A8 TMSB4X	13	TMSB4X	1				-	0	-	0
Tcell_CD3D	Tumor	CD3G ERBB2 FASN HSPB1 KRT18 KRT19 KRT8 LAMA1 S100A14 TFF1 TMSB4X	11	CD3G ERBB2 FASN HSPB1 KRT19 KRT8 LAMA1 S100A14 TFF1 TMSB4X	10	-	0			Tumor	Tcell_CD3D	C1QA ERBB2 FABP7 FASN FAT1 FGFR4 GRB7 HSPB1 IFITM3 IGHG1 IGHG4 IGKC KRT18 KRT19 LYZ MAPK3 MDM2 MYL6 NOTCH1 S100A14 TMSB4X	21	C1QA ERBB2 FABP7 FASN FAT1 FGFR4 GRB7 HSPB1 IFITM3 IGHG1 IGHG4 IGKC KRT18 KRT19 LYZ MAPK3 MDM2 MYL6 NOTCH1 S100A14 TMSB4X	21	FAT1 IGHG1 IGHG4 KRT18 NOTCH1	5				-	0	KRT18	1
Tcell_CD3D	Tumor_ALDH1A3	ERBB2 JUN MLPH PLEK	4	ERBB2 JUN MLPH PLEK	4	-	0			Tumor_ALDH1A3	Tcell_CD3D	FAT1 FGFR4 GRB7 HSPB1 IFITM3 IGHG1 IGHG4 IGKC KRT18 MAPK3 MYL6 S100A14 SLC39A6	13	FAT1 FGFR4 GRB7 HSPB1 IFITM3 IGHG1 IGHG4 IGKC KRT18 MAPK3 MYL6 S100A14 SLC39A6	13	IGHG4	1				-	0	-	0
Tcell_CD3D	Tumor_EGFR	C1QA CD24 GNG11 JUN KIF23 LYZ S100A9 SNAI2 SOX10 ZNF571	10	C1QA CD24 GNG11 JUN KIF23 LYZ S100A9 SNAI2 SOX10 ZNF571	10	-	0			Tumor_EGFR	Tcell_CD3D	RRM2	1	RRM2	1	-	0				-	0	-	0
Tcell_CD3D	Tumor_EPCAM	CD3G CD69 CDKN2A GATA3 LAMA1 MLPH PECAM1 SULF1	8	CD3G CD69 CDKN2A GATA3 LAMA1 MLPH PECAM1 SULF1	8	LAMA1	1			Tumor_EPCAM	Tcell_CD3D	CD68 CDKN2A COL3A1 GRB7 HSPB1 KRT18 NOTCH1 TFRC	8	CD68 CDKN2A COL3A1 GRB7 HSPB1 KRT18 NOTCH1 TFRC	8	-	0				-	0	-	0
Tcell_CD3D	Tumor_CD44	SDC1 TFF2	2	SDC1 TFF2	2	-	0			Tumor_CD44	Tcell_CD3D	NOTCH1	1	NOTCH1	1	-	0				-	0	-	0
Tcell_CD3D	Tumor_PGR	CCND1 FASN KRT8 RPSA TPM2	5	CCND1 FASN KRT8 RPSA TPM2	5	-	0			Tumor_PGR	Tcell_CD3D	CCND1 CD24 KRT18 KRT19 LYZ MDM2 TMSB4X	7	CCND1 CD24 KRT18 KRT19 LYZ MDM2 TMSB4X	7	-	0				-	0	-	0
Tcell_CD4	Tumor	LAMA1	1	LAMA1	1		0			Tumor	Tcell_CD4	FAT1 FN1 IGHG1 IGHG4 IGHM XCL1	6	FAT1 FN1 IGHG1 IGHG4 IGHM XCL1	6	-	0				-	0	-	0
Tcell_CD4	Tumor_ALDH1A3	RPSA	1	RPSA	1		0			Tumor_ALDH1A3	Tcell_CD4	FASN IGHG1	2	FASN IGHG1	2	-	0				-	0	-	0
Tcell_CD4	Tumor_EGFR	-	-		0		0			Tumor_EGFR	Tcell_CD4	-	-		0		0				-	0	-	0
Tcell_CD4	Tumor_EPCAM	APOE KRT18	2	APOE KRT18	2		0			Tumor_EPCAM	Tcell_CD4	APOE	1	APOE	1		0				-	0	-	0
Tcell_CD4	Tumor_CD44	-	-		0		0			Tumor_CD44	Tcell_CD4	ZNF571	1	ZNF571	1		0				-	0	-	0
Tcell_CD4	Tumor_PGR	ACTA2 MYL9 SNAI2	3	ACTA2 MYL9 SNAI2	3	-	0			Tumor_PGR	Tcell_CD4	CDK7 IGHM XCL1	3	CDK7 IGHM XCL1	3	-	0				-	0	-	0
Tcell_CD8A	Tumor	ANLN C1QA EPCAM FOS LYZ MYL6 PLVAP RB1 RPSA SFRP1 TFF1 TMSB4X	12	ANLN C1QA EPCAM FOS LYZ MYL6 PLVAP RB1 SFRP1	9		0			Tumor	Tcell_CD8A	ACTA2 COL1A2 CSTB ERBB2 FASN FAT1 FGFR4 FN1 FOXP3 HSPB1 IFITM3 IGF1R IGHG1 IGHG4 KIF23 KRT18 KRT19 KRT8 LST1 LTF MAPK3 MT2A MYL6 MYO10 NKG7 PTPRC RPL18 RPSA RRM2 S100A14 SDC1 SULF1 TFEC TFF1 TFRC TMSB4X TTC6 XBP1	38	ACTA2 COL1A2 CSTB ERBB2 FASN FAT1 FGFR4 FN1 FOXP3 HSPB1 IFITM3 IGF1R IGHG1 IGHG4 KIF23 KRT18 KRT19 KRT8 LST1 LTF MAPK3 MT2A MYL6 MYO10 NKG7 PTPRC RPL18 RPSA RRM2 S100A14 SDC1 SULF1 TFEC TFF1 TFRC TMSB4X TTC6 XBP1	38	FASN FAT1 HSPB1 IGHG1 IGHG4 KRT19 RPSA SDC1 TFF1 TFRC TMSB4X	11				-	0	RPSA TFF1 TMSB4X	3
Tcell_CD8A	Tumor_ALDH1A3	SULF1 TSPAN1 XBP1	3	SULF1 TSPAN1 XBP1	3	-	0			Tumor_ALDH1A3	Tcell_CD8A	CSTB ERBB2 FAT1 IGHG1 IGHG4 KIF23 KRT19 KRT8 MYO10 PTTG1 SDC1 SLC39A6 TFEC TFRC TMSB4X TSPAN1 TTC6	17	CSTB ERBB2 FAT1 IGHG1 IGHG4 KIF23 KRT19 KRT8 MYO10 PTTG1 SDC1 SLC39A6 TFEC TFRC TMSB4X TSPAN1 TTC6	17	-	0				-	0	-	0
Tcell_CD8A	Tumor_EGFR	TFRC	1	TFRC	1		0			Tumor_EGFR	Tcell_CD8A	CD36 COL1A2 COL3A1 COL4A1 ERBB2 FASN FOS FOXP3 LTF PTPRC SDC1	11	CD36 COL1A2 COL3A1 COL4A1 ERBB2 FASN FOS FOXP3 LTF PTPRC SDC1	11	-	0				-	0	-	0
Tcell_CD8A	Tumor_EPCAM	EPCAM FASN FOS IGHG1 MYL6 PLVAP PTPRB RPSA TFF1	9	EPCAM FASN FOS IGHG1 MYL6 PLVAP PTPRB RPSA TFF1	9	-	0			Tumor_EPCAM	Tcell_CD8A	CCNB1 CDK6 FASN HSPB1 IFITM3 KRT18 KRT19 KRT8 LILRB1 MT2A MYL6 RPSA STMN1 TFF1 TMSB4X XBP1	16	CCNB1 CDK6 FASN HSPB1 IFITM3 KRT18 KRT19 KRT8 LILRB1 MT2A MYL6 RPSA STMN1 TFF1 TMSB4X XBP1	16	-	0				-	0	-	0
Tcell_CD8A	Tumor_CD44	ANLN C1QA LDB2 SDC1 TFF1 TFF2	6	ANLN C1QA LDB2 SDC1 TFF1 TFF2	6	TFF2	1			Tumor_CD44	Tcell_CD8A	FOXP3 SDC1 TFF1	3	FOXP3 SDC1 TFF1	3	-	0				-	0	-	0
Tcell_CD8A	Tumor_PGR	-	-		0		0			Tumor_PGR	Tcell_CD8A	FAT1 FN1 HSPB1 MT2A POU2AF1	5	FAT1 FN1 HSPB1 MT2A POU2AF1	5	-	0				-	0	-	0
			438		412		23						862		849		188					13		26
				0.940639										0.984919

## Sheet: Compare Filters NonTumorToTumor
Cell Type X	Cell Type Y	DE [names]	DE [number]		DE [names] - Filter 1	DE [number]		DE [names] - Filter 2	DE [number]		DE [names] - Overlap	DE [number]
Bcell	Tumor	APOE CCND1 CD68 CD74 CDKN2A COL1A1 COL1A2 COL3A1 COL4A1 CST3 FGFR1 FTL GATA3 HLA.A HLA.B KRT18 KRT19 LYZ MT2A MYL6 SNAI2 SULF1 TIMP1 TMSB4X TSPAN1	25		APOE CCND1 CD68 CD74 CDKN2A COL1A1 COL1A2 COL3A1 COL4A1 CST3 FGFR1 FTL GATA3 HLA.A HLA.B LYZ MT2A MYL6 SNAI2 TIMP1 TMSB4X TSPAN1 SULF1	23		APOE CCND1 CD68 CD74 CDKN2A COL3A1 COL4A1 CST3 FGFR1 GATA3 HLA.A MT2A MYL6 SNAI2 SULF1 TIMP1 TMSB4X TSPAN1	18		APOE CCND1 CD68 CD74 CDKN2A COL3A1 COL4A1 CST3 FGFR1 GATA3 HLA.A MT2A MYL6 SNAI2 SULF1 TIMP1 TMSB4X TSPAN1	18
Bcell	Tumor_ALDH1A3	AHR CD19 FABP7 FCN1 FCRL5 FGFR4 KRT17 LTF MLPH MT2A SLC39A6 SPDEF TRAC TSPAN1 TYMS	15		AHR CD19 FABP7 FCN1 FCRL5 FGFR4 KRT17 LTF MLPH MT2A SLC39A6 SPDEF TRAC TSPAN1 TYMS	15		AHR CD19 FABP7 FCRL5 KRT17 LTF MLPH MT2A SPDEF TRAC TSPAN1 TYMS	12		AHR CD19 FABP7 FCRL5 KRT17 LTF MLPH MT2A SPDEF TRAC TSPAN1 TYMS	12
Bcell	Tumor_EGFR	ACTA2 ANLN APOE BGN BICC1 C1QA CD19 CD74 CDK4 COL1A1 COL1A2 COL3A1 COL4A1 COL4A2 CTSL FGFR1 FN1 GNG11 HLA.A HLA.B HLA.DRB1 ISG15 KIF23 KRT17 MLPH MMP11 MT2A MYB MYL6 PTEN SNAI2 TCF4 TIMP1 TMSB4X TTC6	35		ACTA2 ANLN APOE BGN BICC1 C1QA CD19 CD74 CDK4 COL1A1 COL1A2 COL3A1 COL4A1 COL4A2 CTSL FGFR1 FN1 GNG11 HLA.A HLA.B HLA.DRB1 ISG15 KIF23 KRT17 MLPH MMP11 MT2A MYB MYL6 PTEN SNAI2 TCF4 TIMP1 TMSB4X TTC6	35		ACTA2 ANLN APOE BGN BICC1 C1QA CD19 CD74 CDK4 COL1A1 COL1A2 COL3A1 COL4A1 COL4A2 CTSL FGFR1 FN1 HLA.A HLA.B HLA.DRB1 ISG15 KIF23 KRT17 MLPH MMP11 MT2A MYB MYL6 PTEN SNAI2 TCF4 TIMP1 TMSB4X TTC6	34		ACTA2 ANLN APOE BGN BICC1 C1QA CD19 CD74 CDK4 COL1A1 COL1A2 COL3A1 COL4A1 COL4A2 CTSL FGFR1 FN1 HLA.A HLA.B HLA.DRB1 ISG15 KIF23 KRT17 MLPH MMP11 MT2A MYB MYL6 PTEN SNAI2 TCF4 TIMP1 TMSB4X TTC6	34
Bcell	Tumor_EPCAM	FAT1 FTL IGKC TFF1	4		TFF1 FAT1 FTL IGKC	4		FAT1 FTL IGKC TFF1	4		FAT1 FTL IGKC TFF1	4
Bcell	Tumor_CD44	FAT1 FGFR4 IGHG1 IGHG4 LST1	5		FAT1 FGFR4 IGHG1 IGHG4 LST1	5		FAT1 FGFR4 IGHG1 IGHG4 LST1	5		FAT1 FGFR4 IGHG1 IGHG4 LST1	5
Bcell	Tumor_PGR	CD68 CD69 CD74 CDK7 CDKN2A CST3 FGFR1 FTL GATA3 GNG11 HLA.B KIF23 MYL9 PTTG1 SNAI2 TIMP1 TPM2	17		CD68 CD69 CD74 CDK7 CDKN2A CST3 FGFR1 FTL GATA3 GNG11 HLA.B KIF23 MYL9 SNAI2 TIMP1 TPM2 PTTG1	17		CD68 CD69 CD74 CDK7 CDKN2A CST3 FGFR1 FTL GATA3 GNG11 HLA.B KIF23 MYL9 PTTG1 SNAI2 TIMP1 TPM2	17		CD68 CD69 CD74 CDK7 CDKN2A CST3 FGFR1 FTL GATA3 GNG11 HLA.B KIF23 MYL9 PTTG1 SNAI2 TIMP1 TPM2	17
Bcell_IGHG1	Tumor	APOE CCNB1 CD74 CST3 HLA.B	5		APOE CCNB1 CD74 CST3 HLA.B	5		APOE CCNB1 CD74 CST3 HLA.B	5		APOE CCNB1 CD74 CST3 HLA.B	5
Bcell_IGHG1	Tumor_ALDH1A3	CD69 FCGR3A LTF TSPAN1	4		FCGR3A LTF TSPAN1 CD69	4		CD69 FCGR3A LTF TSPAN1	4		CD69 FCGR3A LTF TSPAN1	4
Bcell_IGHG1	Tumor_EGFR	APOE CD19 KRT17 KRT19 MYL6 TTC6	6		APOE CD19 KRT17 MYL6 TTC6	5		APOE CD19 KRT17 KRT19 MYL6 TTC6	6		APOE CD19 KRT17 MYL6 TTC6	5
Bcell_IGHG1	Tumor_EPCAM	-	-		-	-			-		-	-
Bcell_IGHG1	Tumor_CD44	-	-		-	-			-		-	-
Bcell_IGHG1	Tumor_PGR	APOE CCNB1 CD68 CD74 COL3A1 CST3 ISG20 MYL9 SNAI2 TIMP1 TPM2	11		APOE CCNB1 CD68 CD74 COL3A1 CST3 ISG20 MYL9 SNAI2 TIMP1 TPM2	11		APOE CCNB1 CD68 CD74 COL3A1 CST3 ISG20 MYL9 SNAI2 TIMP1 TPM2	11		APOE CCNB1 CD68 CD74 COL3A1 CST3 ISG20 MYL9 SNAI2 TIMP1 TPM2	11
Bcell_IGKC	Tumor	ACTA2 CDKN2A COL1A1 COL1A2 COL3A1 COL4A1 COL4A2 FAT1 FGFR1 GATA3 LYZ MYL6 PTTG1 SNAI2 SULF1 TMSB4X TYMS	17		ACTA2 CDKN2A COL1A1 COL1A2 COL3A1 COL4A1 COL4A2 FGFR1 GATA3 LYZ MYL6 SNAI2 TMSB4X TYMS FAT1 PTTG1 SULF1	17		ACTA2 CDKN2A COL3A1 COL4A1 COL4A2 FGFR1 GATA3 MYL6 PTTG1 SNAI2 SULF1 TMSB4X TYMS	13		ACTA2 CDKN2A COL3A1 COL4A1 COL4A2 FGFR1 GATA3 MYL6 PTTG1 SNAI2 SULF1 TMSB4X TYMS	13
Bcell_IGKC	Tumor_ALDH1A3	CD19 FGFR4 MT2A SLC39A6 SPDEF TYMS	6		CD19 FGFR4 MT2A SLC39A6 SPDEF TYMS	6		CD19 FGFR4 MT2A SPDEF TYMS	5		CD19 FGFR4 MT2A SPDEF TYMS	5
Bcell_IGKC	Tumor_EGFR	ANLN BGN C1QA CD38 CD74 CDK4 COL1A1 COL1A2 COL3A1 COL4A1 COL4A2 CTSL FAT1 FGFR1 FGFR4 FN1 HLA.B ISG15 KIT LST1 MAPK3 MLPH MMP11 MT2A MYL6 PTEN SNAI2 TAGLN TFF2 TIMP1 TMSB4X	31		ANLN BGN C1QA CD38 CD74 CDK4 COL1A1 COL1A2 COL3A1 COL4A1 COL4A2 CTSL FGFR1 FN1 HLA.B ISG15 KIT MLPH MMP11 MT2A MYL6 PTEN SNAI2 TAGLN TFF2 TIMP1 TMSB4X FAT1 FGFR4 LST1 MAPK3	31		ANLN BGN C1QA CD38 CD74 CDK4 COL1A1 COL1A2 COL3A1 COL4A1 COL4A2 CTSL FAT1 FGFR1 FGFR4 FN1 HLA.B ISG15 KIT LST1 MAPK3 MLPH MMP11 MT2A MYL6 PTEN SNAI2 TAGLN TFF2 TIMP1 TMSB4X	31		ANLN BGN C1QA CD38 CD74 CDK4 COL1A1 COL1A2 COL3A1 COL4A1 COL4A2 CTSL FAT1 FGFR1 FGFR4 FN1 HLA.B ISG15 KIT LST1 MAPK3 MLPH MMP11 MT2A MYL6 PTEN SNAI2 TAGLN TFF2 TIMP1 TMSB4X	31
Bcell_IGKC	Tumor_EPCAM	FAT1 IGKC KRT19 TFF1	4		TFF1 FAT1 IGKC	3		FAT1 IGKC KRT19 TFF1	4		FAT1 IGKC TFF1	3
Bcell_IGKC	Tumor_CD44	FAT1 IGHG4	2		FAT1 IGHG4	2		FAT1 IGHG4	2		FAT1 IGHG4	2
Bcell_IGKC	Tumor_PGR	ACTA2 CD68 CD69 CDK7 CDKN2A FGFR1 FOS FTL GATA3 GNG11 HIF1A KIF23 PTTG1 S100A9 SNAI2 TPM2	16		ACTA2 CD68 CD69 CDK7 CDKN2A FGFR1 FTL GATA3 GNG11 KIF23 S100A9 SNAI2 TPM2 FOS HIF1A PTTG1	16		ACTA2 CD68 CD69 CDK7 CDKN2A FGFR1 FOS FTL GATA3 GNG11 HIF1A KIF23 PTTG1 S100A9 SNAI2 TPM2	16		ACTA2 CD68 CD69 CDK7 CDKN2A FGFR1 FOS FTL GATA3 GNG11 HIF1A KIF23 PTTG1 S100A9 SNAI2 TPM2	16
Fibroblast	Tumor	CD3G KRT18 MYL6 RPSA SULF1 TMSB4X TSPAN1	7		MYL6 RPSA TMSB4X TSPAN1 CD3G SULF1	6		KRT18 MYL6 TMSB4X TSPAN1	4		MYL6 TMSB4X TSPAN1	3
Fibroblast	Tumor_ALDH1A3	CD24 CTSL ERBB2 FTL KIT KRT18 KRT19 LYZ MAPK3 PABPC1 PTPRC RPL18 RPSA SNAI2 STAT5A TFF3 TSPAN1 XBP1	18		CTSL FTL KIT LYZ MAPK3 PABPC1 PTPRC RPL18 RPSA SNAI2 STAT5A TFF3 TSPAN1 XBP1	14		CD24 CTSL ERBB2 FTL KIT KRT18 KRT19 LYZ MAPK3 PABPC1 PTPRC RPL18 RPSA SNAI2 STAT5A TFF3 TSPAN1 XBP1	18		CTSL FTL KIT LYZ MAPK3 PABPC1 PTPRC RPL18 RPSA SNAI2 STAT5A TFF3 TSPAN1 XBP1	14
Fibroblast	Tumor_EGFR	ACTA2 CSTB ICOS KIF23 LTF SDC1	6		ACTA2 CSTB KIF23 SDC1 ICOS LTF	6		ACTA2 CSTB ICOS KIF23 LTF SDC1	6		ACTA2 CSTB ICOS KIF23 LTF SDC1	6
Fibroblast	Tumor_EPCAM	CD3G HIF1A HSPG2 JUN LAMA1 MMP11 MYL6 POU2AF1 SKAP1 SULF1	10		LAMA1 MYL6 POU2AF1 SKAP1 CD3G HIF1A HSPG2 JUN MMP11 SULF1	10		CD3G HIF1A HSPG2 JUN LAMA1 MMP11 MYL6 POU2AF1 SKAP1 SULF1	10		CD3G HIF1A HSPG2 JUN LAMA1 MMP11 MYL6 POU2AF1 SKAP1 SULF1	10
Fibroblast	Tumor_CD44	-	-		-	-		-	-		-	-
Fibroblast	Tumor_PGR	CD3G SDC1	2		SDC1 CD3G	2		CD3G SDC1	2		CD3G SDC1	2
Macrophage	Tumor	CD24 FGFR4 FN1 HIF1A IGHG1 IGKC KRT19 LYZ TFF1	9		HIF1A LYZ TFF1 FGFR4 FN1 IGHG1 IGKC	7		CD24 FGFR4 FN1 HIF1A IGHG1 IGKC KRT19 LYZ TFF1	9		FGFR4 FN1 HIF1A IGHG1 IGKC LYZ TFF1	7
Macrophage	Tumor_ALDH1A3	FN1 IGHG1	2		FN1 IGHG1	2		FN1 IGHG1	2		FN1 IGHG1	2
Macrophage	Tumor_EGFR	-	-		-	-		-	-		-	-
Macrophage	Tumor_EPCAM	APOE CD24 FAT1 FN1 HLA.B IGHG1 IGHG4 IGKC KRT19 LYZ MAPK3 XBP1	12		LYZ XBP1 APOE FAT1 FN1 HLA.B IGHG1 IGHG4 IGKC MAPK3	10		APOE CD24 FAT1 FN1 HLA.B IGHG1 IGHG4 IGKC KRT19 LYZ MAPK3 XBP1	12		APOE FAT1 FN1 HLA.B IGHG1 IGHG4 IGKC LYZ MAPK3 XBP1	10
Macrophage	Tumor_CD44	CD24 FAT1 IGHG1 IGHG4 IL7R KRT18 KRT19 LYZ RPSA TFF1	10		IL7R LYZ RPSA TFF1 FAT1 IGHG1 IGHG4	7		CD24 FAT1 IGHG1 IGHG4 IL7R KRT18 KRT19 LYZ RPSA TFF1	10		FAT1 IGHG1 IGHG4 IL7R LYZ RPSA TFF1	7
Macrophage	Tumor_PGR	CDKN2A SULF1	2		CDKN2A SULF1	2		CDKN2A SULF1	2		CDKN2A SULF1	2
Tcell	Tumor	C1QA CD24 CD3G CD63 EPCAM FASN FTL HSPG2 KRT18 KRT8 LAMA1 LYZ MYL6 PLVAP RPSA S100A14 SDC1 TFF1 TMSB4X	19		C1QA CD63 FASN FTL KRT8 LAMA1 LYZ MYL6 PLVAP RPSA S100A14 SDC1 TFF1 TMSB4X CD3G HSPG2	16		C1QA CD24 CD3G CD63 EPCAM FTL HSPG2 KRT8 LAMA1 LYZ MYL6 PLVAP RPSA S100A14 SDC1 TFF1	16		C1QA CD3G CD63 FTL HSPG2 KRT8 LAMA1 LYZ MYL6 PLVAP RPSA S100A14 SDC1 TFF1	14
Tcell	Tumor_ALDH1A3	BICC1 CD69 CTSL FAP FN1 FOXP3 JUN LAMA1 MLPH	9		BICC1 CTSL FAP FOXP3 JUN MLPH CD69 FN1 LAMA1	9		BICC1 CD69 CTSL FAP FN1 FOXP3 JUN LAMA1 MLPH	9		BICC1 CD69 CTSL FAP FN1 FOXP3 JUN LAMA1 MLPH	9
Tcell	Tumor_EGFR	CD24 CTSL FTL GNG11 KIF23 LGALS2 LYZ SDC1 SOX10 TFRC ZNF571	11		FTL GNG11 KIF23 LGALS2 LYZ SDC1 SOX10 TFRC ZNF571 CTSL	10		CD24 CTSL FTL GNG11 KIF23 LGALS2 LYZ SDC1 SOX10 TFRC ZNF571	11		CTSL FTL GNG11 KIF23 LGALS2 LYZ SDC1 SOX10 TFRC ZNF571	10
Tcell	Tumor_EPCAM	APOE CD3G CDK4 CDK6 EPCAM FASN GATA3 HSPG2 IGHG1 JUN KRAS KRT18 KRT19 LAMA1 MLPH MYL6 PTPRB RPSA S100A14 SULF1 TFF1 THY1 TMSB4X	23		CDK4 CDK6 FASN KRAS LAMA1 MYL6 PTPRB RPSA S100A14 TFF1 THY1 TMSB4X APOE CD3G GATA3 HSPG2 IGHG1 JUN MLPH SULF1	20		APOE CD3G CDK4 CDK6 EPCAM FASN GATA3 HSPG2 IGHG1 JUN KRAS KRT18 KRT19 LAMA1 MLPH MYL6 PTPRB RPSA S100A14 SULF1 TFF1 THY1 TMSB4X	23		APOE CD3G CDK4 CDK6 FASN GATA3 HSPG2 IGHG1 JUN KRAS LAMA1 MLPH MYL6 PTPRB RPSA S100A14 SULF1 TFF1 THY1 TMSB4X	20
Tcell	Tumor_CD44	ANLN C1QA SDC1 TFF1 TFF2 TMSB4X	6		ANLN C1QA SDC1 TFF1 TFF2 TMSB4X	6		ANLN C1QA SDC1 TFF1 TFF2 TMSB4X	6		ANLN C1QA SDC1 TFF1 TFF2 TMSB4X	6
Tcell	Tumor_PGR	C1QA CD69 CD74 HLA.B KRT8 LAMA1 PLVAP PTPRC RPSA TFRC TPM2	11		C1QA CD69 CD74 HLA.B KRT8 LAMA1 PLVAP RPSA TPM2 TFRC	10		C1QA CD69 CD74 HLA.B KRT8 LAMA1 PLVAP PTPRC RPSA TFRC TPM2	11		C1QA CD69 CD74 HLA.B KRT8 LAMA1 PLVAP RPSA TFRC TPM2	10
Tcell_CD3D	Tumor	CD3G ERBB2 FASN HSPB1 KRT18 KRT19 KRT8 LAMA1 S100A14 TFF1 TMSB4X	11		FASN HSPB1 KRT8 LAMA1 S100A14 TFF1 TMSB4X CD3G	8		CD3G ERBB2 FASN HSPB1 KRT19 KRT8 LAMA1 S100A14 TFF1 TMSB4X	10		CD3G FASN HSPB1 KRT8 LAMA1 S100A14 TFF1 TMSB4X	8
Tcell_CD3D	Tumor_ALDH1A3	ERBB2 JUN MLPH PLEK	4		JUN MLPH PLEK	3		ERBB2 JUN MLPH PLEK	4		JUN MLPH PLEK	3
Tcell_CD3D	Tumor_EGFR	C1QA CD24 GNG11 JUN KIF23 LYZ S100A9 SNAI2 SOX10 ZNF571	10		C1QA GNG11 JUN KIF23 LYZ S100A9 SNAI2 SOX10 ZNF571	9		C1QA CD24 GNG11 JUN KIF23 LYZ S100A9 SNAI2 SOX10 ZNF571	10		C1QA GNG11 JUN KIF23 LYZ S100A9 SNAI2 SOX10 ZNF571	9
Tcell_CD3D	Tumor_EPCAM	CD3G CD69 CDKN2A GATA3 LAMA1 MLPH PECAM1 SULF1	8		CD69 LAMA1 CD3G CDKN2A GATA3 MLPH PECAM1 SULF1	8		CD3G CD69 CDKN2A GATA3 LAMA1 MLPH PECAM1 SULF1	8		CD3G CD69 CDKN2A GATA3 LAMA1 MLPH PECAM1 SULF1	8
Tcell_CD3D	Tumor_CD44	SDC1 TFF2	2		SDC1 TFF2	2		SDC1 TFF2	2		SDC1 TFF2	2
Tcell_CD3D	Tumor_PGR	CCND1 FASN KRT8 RPSA TPM2	5		CCND1 FASN KRT8 RPSA TPM2	5		CCND1 FASN KRT8 RPSA TPM2	5		CCND1 FASN KRT8 RPSA TPM2	5
Tcell_CD4	Tumor	LAMA1	1		LAMA1	1		LAMA1	1		LAMA1	1
Tcell_CD4	Tumor_ALDH1A3	RPSA	1		RPSA	1		RPSA	1		RPSA	1
Tcell_CD4	Tumor_EGFR	-	-		-	-		-	-		-	-
Tcell_CD4	Tumor_EPCAM	APOE KRT18	2		APOE	1		APOE KRT18	2		APOE	1
Tcell_CD4	Tumor_CD44	-	-		-	-		-	-		-	-
Tcell_CD4	Tumor_PGR	ACTA2 MYL9 SNAI2	3		ACTA2 MYL9 SNAI2	3		ACTA2 MYL9 SNAI2	3		ACTA2 MYL9 SNAI2	3
Tcell_CD8A	Tumor	ANLN C1QA EPCAM FOS LYZ MYL6 PLVAP RB1 RPSA SFRP1 TFF1 TMSB4X	12		ANLN C1QA FOS LYZ MYL6 PLVAP RPSA TFF1 TMSB4X RB1 SFRP1	11		ANLN C1QA EPCAM FOS LYZ MYL6 PLVAP RB1 SFRP1	9		ANLN C1QA FOS LYZ MYL6 PLVAP RB1 SFRP1	8
Tcell_CD8A	Tumor_ALDH1A3	SULF1 TSPAN1 XBP1	3		SULF1 TSPAN1 XBP1	3		SULF1 TSPAN1 XBP1	3		SULF1 TSPAN1 XBP1	3
Tcell_CD8A	Tumor_EGFR	TFRC	1		TFRC	1		TFRC	1		TFRC	1
Tcell_CD8A	Tumor_EPCAM	EPCAM FASN FOS IGHG1 MYL6 PLVAP PTPRB RPSA TFF1	9		FASN FOS MYL6 PLVAP PTPRB RPSA TFF1 IGHG1	8		EPCAM FASN FOS IGHG1 MYL6 PLVAP PTPRB RPSA TFF1	9		FASN FOS IGHG1 MYL6 PLVAP PTPRB RPSA TFF1	8
Tcell_CD8A	Tumor_CD44	ANLN C1QA LDB2 SDC1 TFF1 TFF2	6		ANLN C1QA LDB2 SDC1 TFF1 TFF2	6		ANLN C1QA LDB2 SDC1 TFF1 TFF2	6		ANLN C1QA LDB2 SDC1 TFF1 TFF2	6
Tcell_CD8A	Tumor_PGR	-	-		-	-			-		-	-
			438			406			412			384
											0.938875

## Sheet: Compare Filters TumorToNonTumor
Cell Type X	Cell Type Y	DE [names]	DE [number]		DE [names] - Filter 1	DE [number]		DE [names] - Filter 2	DE [number]		DE [names] - Overlap	DE [number]
Tumor	Bcell	ACTA2 AHR AZGP1 BGN CCNB1 CCNE2 CD24 CD38 CD68 CD69 CD74 CDKN2A COL1A1 COL1A2 COL3A1 COL4A1 COL4A2 CST3 DERL3 FASN FAT1 FCN1 FGFR4 FN1 FOS FOXP3 FTL GNG11 GRB7 HIF1A HLA.B HSPB1 IFITM3 IGHG1 IGHG4 IGKC ISG20 KIF23 KRT18 KRT19 LAMA1 LST1 LTF LYZ MAPK3 MDM2 MYL6 MYO10 NDC80 PGR PLVAP PTTG1 RPSA S100A8 SLC39A6 SNAI2 SOX10 SULF1 TCL1A TFF1 TIMP1 TPM2 TRAC XBP1 ZNF571	65		ACTA2 AHR AZGP1 BGN CCNB1 CCNE2 CD38 CD68 CD69 CD74 COL1A1 COL1A2 COL3A1 COL4A1 COL4A2 CST3 DERL3 FAT1 FCN1 FGFR4 FN1 FTL GNG11 GRB7 HLA.B ISG20 KIF23 LAMA1 LST1 LTF MAPK3 MYO10 NDC80 PGR PLVAP PTTG1 S100A8 SLC39A6 SNAI2 TCL1A TIMP1 TPM2 TRAC CD24 CDKN2A FASN FOS FOXP3 HIF1A HSPB1 IFITM3 KRT18 KRT19 LYZ MDM2 MYL6 RPSA SOX10 SULF1 TFF1 XBP1 ZNF571	62		ACTA2 AHR AZGP1 BGN CCNB1 CCNE2 CD24 CD38 CD68 CD69 CD74 CDKN2A COL1A1 COL1A2 COL3A1 COL4A1 COL4A2 CST3 DERL3 FASN FAT1 FCN1 FGFR4 FN1 FOS FOXP3 FTL GNG11 GRB7 HIF1A HLA.B HSPB1 IFITM3 IGHG1 IGHG4 IGKC ISG20 KIF23 KRT18 KRT19 LAMA1 LST1 LTF LYZ MAPK3 MDM2 MYL6 MYO10 NDC80 PGR PLVAP PTTG1 RPSA S100A8 SLC39A6 SNAI2 SOX10 SULF1 TCL1A TFF1 TIMP1 TPM2 TRAC XBP1 ZNF571	65		ACTA2 AHR AZGP1 BGN CCNB1 CCNE2 CD24 CD38 CD68 CD69 CD74 CDKN2A COL1A1 COL1A2 COL3A1 COL4A1 COL4A2 CST3 DERL3 FASN FAT1 FCN1 FGFR4 FN1 FOS FOXP3 FTL GNG11 GRB7 HIF1A HLA.B HSPB1 IFITM3 ISG20 KIF23 KRT18 KRT19 LAMA1 LST1 LTF LYZ MAPK3 MDM2 MYL6 MYO10 NDC80 PGR PLVAP PTTG1 RPSA S100A8 SLC39A6 SNAI2 SOX10 SULF1 TCL1A TFF1 TIMP1 TPM2 TRAC XBP1 ZNF571	62
Tumor_ALDH1A3	Bcell	CCNE2 CD19 CD24 CD74 CDK4 CDKN2A FAT1 FCN1 FGFR4 FOS FOXP3 GRB7 HIF1A HSPB1 HSPG2 ICOS IFITM3 IGHG1 IGHG4 IGKC KRT19 LST1 LTF LYZ MAPK3 MYO10 PTTG1 RPSA S100A8 SLC39A6 SOX10 SULF1 TFF1 TRAC XBP1	35		CCNE2 CD19 CD74 FAT1 FCN1 FGFR4 LST1 LTF MAPK3 MYO10 PTTG1 S100A8 SLC39A6 TRAC CD24 CDK4 CDKN2A FOS FOXP3 GRB7 HIF1A HSPB1 HSPG2 ICOS IFITM3 KRT19 LYZ RPSA SOX10 SULF1 TFF1 XBP1	32		CCNE2 CD19 CD24 CD74 CDK4 CDKN2A FAT1 FCN1 FGFR4 FOS FOXP3 GRB7 HIF1A HSPB1 HSPG2 ICOS IFITM3 IGHG1 IGHG4 IGKC KRT19 LST1 LTF LYZ MAPK3 MYO10 PTTG1 RPSA S100A8 SLC39A6 SOX10 SULF1 TFF1 TRAC XBP1	35		CCNE2 CD19 CD24 CD74 CDK4 CDKN2A FAT1 FCN1 FGFR4 FOS FOXP3 GRB7 HIF1A HSPB1 HSPG2 ICOS IFITM3 KRT19 LST1 LTF LYZ MAPK3 MYO10 PTTG1 RPSA S100A8 SLC39A6 SOX10 SULF1 TFF1 TRAC XBP1	32
Tumor_EGFR	Bcell	ANLN BCL2 C1QA CD38 CD69 COL1A1 COL1A2 COL4A1 COL4A2 CST3 FN1 FOXP3 GNG11 HIF1A HLA.B IGHG1 IGHG4 IGKC KIF23 LYZ MYO10 PLVAP SULF1 TIMP1	24		ANLN BCL2 C1QA CD38 CD69 COL1A1 COL1A2 COL4A1 COL4A2 CST3 FN1 GNG11 HLA.B KIF23 MYO10 PLVAP TIMP1 FOXP3 HIF1A LYZ SULF1	21		ANLN BCL2 C1QA CD38 CD69 COL1A2 CST3 FOXP3 GNG11 HIF1A HLA.B IGHG1 IGHG4 IGKC KIF23 LYZ MYO10 PLVAP SULF1	19		ANLN BCL2 C1QA CD38 CD69 COL1A2 CST3 FOXP3 GNG11 HIF1A HLA.B KIF23 LYZ MYO10 PLVAP SULF1	16
Tumor_EPCAM	Bcell	COL4A1 COL4A2 FN1 GRB7 HIF1A IGHG1 KRT18 KRT19	8		COL4A1 COL4A2 FN1 GRB7 HIF1A KRT18 KRT19	7		COL4A1 COL4A2 FN1 GRB7 HIF1A IGHG1 KRT18 KRT19	8		COL4A1 COL4A2 FN1 GRB7 HIF1A KRT18 KRT19	7
Tumor_CD44	Bcell	FN1 GNG11 HLA.B KIF23 KRT19 LAMA1 PLVAP TFF1 TPM2	9		FN1 GNG11 HLA.B KIF23 LAMA1 PLVAP TPM2 KRT19 TFF1	9		FN1 GNG11 HLA.B KIF23 KRT19 LAMA1 PLVAP TFF1 TPM2	9		FN1 GNG11 HLA.B KIF23 KRT19 LAMA1 PLVAP TFF1 TPM2	9
Tumor_PGR	Bcell	AHR AZGP1 CCNE2 CD24 CD68 COL1A1 FAT1 FGFR4 FOS FTL GRB7 HIF1A HLA.B HSPB1 IGHG1 IGHG4 IGHM IGKC ISG20 KRT18 KRT19 LST1 LYZ MAPK3 MDM2 PGR RPSA S100A8 SLC39A6 SNAI2 TFF1 TPM2 XBP1	33		AHR AZGP1 CCNE2 CD68 COL1A1 FAT1 FGFR4 FTL GRB7 HLA.B ISG20 LST1 MAPK3 PGR S100A8 SLC39A6 SNAI2 TPM2 CD24 FOS HIF1A HSPB1 KRT18 KRT19 LYZ MDM2 RPSA TFF1 XBP1	29		AHR AZGP1 CCNE2 CD24 CD68 COL1A1 FAT1 FGFR4 FOS FTL GRB7 HIF1A HLA.B HSPB1 IGHG1 IGHG4 IGHM IGKC ISG20 KRT18 KRT19 LST1 LYZ MAPK3 MDM2 PGR RPSA S100A8 SLC39A6 SNAI2 TFF1 TPM2 XBP1	33		AHR AZGP1 CCNE2 CD24 CD68 COL1A1 FAT1 FGFR4 FOS FTL GRB7 HIF1A HLA.B HSPB1 ISG20 KRT18 KRT19 LST1 LYZ MAPK3 MDM2 PGR RPSA S100A8 SLC39A6 SNAI2 TFF1 TPM2 XBP1	29
Tumor	Bcell_IGHG1	AHR CCNB1 CCNE2 CD19 CD24 CD38 CD74 COL1A1 COL1A2 COL3A1 CST3 CSTB DERL3 FAT1 FCN1 FGFR4 FOS FOXP3 FTL GNG11 HIF1A HLA.B HSPB1 IGHG1 IGHG4 IGKC KRT19 LST1 LTF LYZ MAPK3 NDC80 PGR PTTG1 RPSA S100A8 SLC39A6 SNAI2 SOX10 TFF1 TPM2 TRAC ZNF571	43		AHR CCNB1 CCNE2 CD19 CD38 CD74 COL1A1 COL1A2 COL3A1 CST3 CSTB DERL3 FAT1 FCN1 FGFR4 FTL GNG11 HLA.B LST1 LTF MAPK3 NDC80 PGR PTTG1 S100A8 SLC39A6 SNAI2 TPM2 TRAC CD24 FOS FOXP3 HIF1A HSPB1 KRT19 LYZ RPSA SOX10 TFF1 ZNF571	40		AHR CCNB1 CCNE2 CD19 CD24 CD38 CD74 COL1A1 COL1A2 COL3A1 CST3 CSTB DERL3 FAT1 FCN1 FGFR4 FOS FOXP3 FTL GNG11 HIF1A HLA.B HSPB1 IGHG1 IGHG4 IGKC KRT19 LST1 LTF LYZ MAPK3 NDC80 PGR PTTG1 RPSA S100A8 SLC39A6 SNAI2 SOX10 TFF1 TPM2 TRAC ZNF571	43		AHR CCNB1 CCNE2 CD19 CD24 CD38 CD74 COL1A1 COL1A2 COL3A1 CST3 CSTB DERL3 FAT1 FCN1 FGFR4 FOS FOXP3 FTL GNG11 HIF1A HLA.B HSPB1 KRT19 LST1 LTF LYZ MAPK3 NDC80 PGR PTTG1 RPSA S100A8 SLC39A6 SNAI2 SOX10 TFF1 TPM2 TRAC ZNF571	40
Tumor_ALDH1A3	Bcell_IGHG1	CCNE2 CD19 CD24 COL4A1 CSTB FAT1 FCN1 FGFR4 FOS FOXP3 FTL GRB7 HIF1A IGHG1 IGHG4 IGKC KRT19 LST1 LYZ MAPK3 MYO10 PLVAP PTTG1 S100A8 SDC1 SLC39A6 SULF1 TFF1 TRAC	29		CCNE2 CD19 CSTB FAT1 FCN1 FGFR4 FTL LST1 MAPK3 MYO10 PLVAP PTTG1 S100A8 SDC1 SLC39A6 TRAC CD24 COL4A1 FOS FOXP3 GRB7 HIF1A KRT19 LYZ SULF1 TFF1	26		CCNE2 CD19 CD24 COL4A1 CSTB FAT1 FCN1 FGFR4 FOS FOXP3 FTL GRB7 HIF1A IGHG1 IGHG4 IGKC KRT19 LST1 LYZ MAPK3 MYO10 PLVAP PTTG1 S100A8 SDC1 SLC39A6 SULF1 TFF1 TRAC	29		CCNE2 CD19 CD24 COL4A1 CSTB FAT1 FCN1 FGFR4 FOS FOXP3 FTL GRB7 HIF1A KRT19 LST1 LYZ MAPK3 MYO10 PLVAP PTTG1 S100A8 SDC1 SLC39A6 SULF1 TFF1 TRAC	26
Tumor_EGFR	Bcell_IGHG1	ANLN CD69 COL1A2 CSTB FAT1 FN1 HIF1A HLA.B IGHG1 IGHG4 IGKC KRT19	12		ANLN CD69 COL1A2 CSTB FAT1 FN1 HLA.B HIF1A KRT19	9		ANLN CD69 COL1A2 CSTB FAT1 FN1 HIF1A HLA.B IGHG1 IGHG4 IGKC KRT19	12		ANLN CD69 COL1A2 CSTB FAT1 FN1 HIF1A HLA.B KRT19	9
Tumor_EPCAM	Bcell_IGHG1	-	-		-	-			-		-	-
Tumor_CD44	Bcell_IGHG1	COL1A1 COL1A2 FN1 TPM2	4		COL1A1 COL1A2 FN1 TPM2	4		COL1A1 COL1A2 FN1 TPM2	4		COL1A1 COL1A2 FN1 TPM2	4
Tumor_PGR	Bcell_IGHG1	AHR AZGP1 CCNB1 CCNE2 CD24 CST3 CTSL DERL3 FAT1 FCN1 FGFR4 FOS FTL GRB7 HIF1A HLA.B IGHG1 IGHG4 IGKC KRT19 LST1 LYPD6B LYZ MAPK3 PECAM1 PGR PTTG1 S100A8 SLC39A6 TFF1 TPM2 TRAC TSPAN1	33		AHR AZGP1 CCNB1 CCNE2 CST3 CTSL DERL3 FAT1 FCN1 FGFR4 FTL GRB7 HLA.B LST1 LYPD6B MAPK3 PECAM1 PGR PTTG1 S100A8 SLC39A6 TPM2 TRAC TSPAN1 CD24 FOS HIF1A KRT19 LYZ TFF1	30		AHR AZGP1 CCNB1 CCNE2 CD24 CST3 CTSL DERL3 FAT1 FCN1 FGFR4 FOS FTL GRB7 HIF1A HLA.B IGHG1 IGHG4 IGKC KRT19 LST1 LYPD6B LYZ MAPK3 PECAM1 PGR PTTG1 S100A8 SLC39A6 TFF1 TPM2 TRAC TSPAN1	33		AHR AZGP1 CCNB1 CCNE2 CD24 CST3 CTSL DERL3 FAT1 FCN1 FGFR4 FOS FTL GRB7 HIF1A HLA.B KRT19 LST1 LYPD6B LYZ MAPK3 PECAM1 PGR PTTG1 S100A8 SLC39A6 TFF1 TPM2 TRAC TSPAN1	30
Tumor	Bcell_IGKC	ACTA2 C1QA CCNE2 CD24 CD38 CD3G CD68 CD69 CDKN2A COL1A1 COL1A2 COL3A1 COL4A1 COL4A2 CST3 FASN FAT1 FCN1 FGFR1 FGFR4 FN1 FOS FOXP3 GNG11 GRB7 HIF1A HLA.B HSPB1 IFITM3 IGHG1 IGHG4 IGKC KIF23 KRT18 KRT19 LAMA1 LST1 LYZ MAPK3 MDM2 MYL6 MYO10 PGR PLVAP PTTG1 RPSA S100A8 SLC39A6 SNAI2 SOX10 SULF1 TFF1 TIMP1 TPM2 TRAC XBP1 ZNF571	57		ACTA2 C1QA CCNE2 CD38 CD68 CD69 COL1A1 COL1A2 COL3A1 COL4A1 COL4A2 CST3 FAT1 FCN1 FGFR1 FGFR4 FN1 GNG11 GRB7 HLA.B KIF23 LAMA1 LST1 MAPK3 MYO10 PGR PLVAP PTTG1 S100A8 SLC39A6 SNAI2 TIMP1 TPM2 TRAC CD24 CD3G CDKN2A FASN FOS FOXP3 HIF1A HSPB1 IFITM3 KRT18 KRT19 LYZ MDM2 MYL6 RPSA SOX10 SULF1 TFF1 XBP1 ZNF571	54		ACTA2 C1QA CCNE2 CD24 CD38 CD3G CD68 CD69 CDKN2A COL1A1 COL1A2 COL3A1 COL4A1 COL4A2 CST3 FASN FAT1 FCN1 FGFR1 FGFR4 FN1 FOS FOXP3 GNG11 GRB7 HIF1A HLA.B HSPB1 IFITM3 IGHG1 IGHG4 IGKC KIF23 KRT18 KRT19 LAMA1 LST1 LYZ MAPK3 MDM2 MYL6 MYO10 PGR PLVAP PTTG1 RPSA S100A8 SLC39A6 SNAI2 SOX10 SULF1 TFF1 TIMP1 TPM2 TRAC XBP1 ZNF571	57		ACTA2 C1QA CCNE2 CD24 CD38 CD3G CD68 CD69 CDKN2A COL1A1 COL1A2 COL3A1 COL4A1 COL4A2 CST3 FASN FAT1 FCN1 FGFR1 FGFR4 FN1 FOS FOXP3 GNG11 GRB7 HIF1A HLA.B HSPB1 IFITM3 KIF23 KRT18 KRT19 LAMA1 LST1 LYZ MAPK3 MDM2 MYL6 MYO10 PGR PLVAP PTTG1 RPSA S100A8 SLC39A6 SNAI2 SOX10 SULF1 TFF1 TIMP1 TPM2 TRAC XBP1 ZNF571	54
Tumor_ALDH1A3	Bcell_IGKC	CD24 CD3G CDK4 CDKN2A FAT1 FCN1 FGFR4 FOS FOXP3 HIF1A HSPB1 HSPG2 IGHG1 IGHG4 IGKC KRT19 LST1 LYZ MAPK3 MDM2 MYL6 MYO10 PTTG1 RPSA S100A8 SLC39A6 SOX10 SULF1 TFF1 TRAC	30		FAT1 FCN1 FGFR4 LST1 MAPK3 MYO10 PTTG1 S100A8 SLC39A6 TRAC CD24 CD3G CDK4 CDKN2A FOS FOXP3 HIF1A HSPB1 HSPG2 KRT19 LYZ MDM2 MYL6 RPSA SOX10 SULF1 TFF1	27		CD24 CD3G CDK4 CDKN2A FAT1 FCN1 FGFR4 FOS FOXP3 HIF1A HSPB1 HSPG2 IGHG1 IGHG4 IGKC KRT19 LST1 LYZ MAPK3 MDM2 MYL6 MYO10 PTTG1 RPSA S100A8 SLC39A6 SOX10 SULF1 TFF1 TRAC	30		CD24 CD3G CDK4 CDKN2A FAT1 FCN1 FGFR4 FOS FOXP3 HIF1A HSPB1 HSPG2 KRT19 LST1 LYZ MAPK3 MDM2 MYL6 MYO10 PTTG1 RPSA S100A8 SLC39A6 SOX10 SULF1 TFF1 TRAC	27
Tumor_EGFR	Bcell_IGKC	ACTA2 ANLN BCL2 C1QA CD38 CD69 CDK4 COL1A1 COL1A2 COL4A1 COL4A2 FGFR1 FN1 FOXP3 GNG11 GRB7 HIF1A HLA.B IGHG1 IGKC MYO10 PLVAP TAGLN TIMP1 TPM2	25		ACTA2 ANLN BCL2 C1QA CD38 CD69 CDK4 COL1A1 COL1A2 COL4A1 COL4A2 FGFR1 FN1 GNG11 GRB7 HLA.B MYO10 PLVAP TAGLN TIMP1 TPM2 FOXP3 HIF1A	23		ACTA2 ANLN BCL2 C1QA CD38 CD69 CDK4 FOXP3 GNG11 GRB7 HIF1A HLA.B IGHG1 IGKC MYO10 PLVAP TAGLN TIMP1 TPM2	19		ACTA2 ANLN BCL2 C1QA CD38 CD69 CDK4 FOXP3 GNG11 GRB7 HIF1A HLA.B MYO10 PLVAP TAGLN TIMP1 TPM2	17
Tumor_EPCAM	Bcell_IGKC	COL4A1 COL4A2 FN1 GRB7 HIF1A IGHG1 KRT18 KRT19	8		COL4A1 COL4A2 FN1 GRB7 HIF1A KRT18 KRT19	7		COL4A1 COL4A2 FN1 GRB7 HIF1A IGHG1 KRT18 KRT19	8		COL4A1 COL4A2 FN1 GRB7 HIF1A KRT18 KRT19	7
Tumor_CD44	Bcell_IGKC	CCNE1 GNG11 HLA-B KIF23 PLVAP TCF4 TCL1A KRT19 TFF1	9		CCNE1 GNG11 HLA.B KIF23 PLVAP TCF4 TCL1A KRT19 TFF1	9		CCNE1 GNG11 HLA-B KIF23 PLVAP TCF4 TCL1A KRT19 TFF1	9		CCNE1 GNG11 KIF23 PLVAP TCF4 TCL1A KRT19 TFF1	8
Tumor_PGR	Bcell_IGKC	AZGP1 CCNE2 CD68 COL1A1 COL1A2 FAT1 FGFR4 FOS GRB7 HIF1A HLA.B HSPB1 IGHG1 IGHG4 IGKC KRT19 LST1 LYZ MAPK3 MDM2 RPSA S100A8 SNAI2 TFF1 TPM2 XBP1	26		AZGP1 CCNE2 CD68 COL1A1 COL1A2 FAT1 FGFR4 GRB7 HLA.B LST1 MAPK3 S100A8 SNAI2 TPM2 FOS HIF1A HSPB1 KRT19 LYZ MDM2 RPSA TFF1 XBP1	23		AZGP1 CCNE2 CD68 COL1A1 COL1A2 FAT1 FGFR4 FOS GRB7 HIF1A HLA.B HSPB1 IGHG1 IGHG4 IGKC KRT19 LST1 LYZ MAPK3 MDM2 RPSA S100A8 SNAI2 TFF1 TPM2 XBP1	26		AZGP1 CCNE2 CD68 COL1A1 COL1A2 FAT1 FGFR4 FOS GRB7 HIF1A HLA.B HSPB1 KRT19 LST1 LYZ MAPK3 MDM2 RPSA S100A8 SNAI2 TFF1 TPM2 XBP1	23
Tumor	Fibroblast	APOE BGN C1QA CCNB1 CD24 CD36 CD3G CD68 CD69 CD79B CDK6 CDKN2A COL1A1 COL1A2 CRABP2 CTSL ERBB2 FAT1 FN1 FOS FOXP3 GNG11 GZMB HIF1A HLA.B HSPB1 ICOS IFITM3 IGHG1 IGHG4 IGKC IL2RA JUN KIF23 KRT8 KRT18 KRT19 LAMA1 LYZ MDM2 MLPH MYL6 MYO10 NOTCH1 PABPC1 PGR PLVAP RPSA S100A8 SDC1 SOX10 SOX4 SULF1 TFF1 THY1 TPM2 TTC6 XBP1 ZNF571	59		APOE CD24 CD36 CD3G CDKN2A CRABP2 CTSL ERBB2 FOS FOXP3 GZMB HIF1A HSPB1 ICOS IFITM3 JUN KRT18 KRT19 LYZ MDM2 MLPH MYL6 NOTCH1 PABPC1 RPSA SOX10 SOX4 TFF1 THY1 XBP1 ZNF571 BGN C1QA CCNB1 CD68 CD69 CD79B CDK6 COL1A1 COL1A2 FAT1 FN1 GNG11 HLA.B IGHG1 IGHG4 IGKC IL2RA KIF23 KRT8 LAMA1 MYO10 PGR PLVAP S100A8 SDC1 TPM2 TTC6	58		APOE BGN C1QA CCNB1 CD24 CD36 CD3G CD68 CD69 CD79B CDK6 CDKN2A COL1A1 COL1A2 CRABP2 CTSL ERBB2 FAT1 FN1 FOS FOXP3 GNG11 GZMB HIF1A HLA.B HSPB1 ICOS IFITM3 IGHG1 IGHG4 IGKC IL2RA JUN KIF23 KRT8 KRT18 KRT19 LAMA1 LYZ MDM2 MLPH MYL6 MYO10 NOTCH1 PABPC1 PGR PLVAP RPSA S100A8 SDC1 SOX10 SOX4 SULF1 TFF1 THY1 TPM2 TTC6 XBP1 ZNF571	59		APOE BGN C1QA CCNB1 CD24 CD36 CD3G CD68 CD69 CD79B CDK6 CDKN2A COL1A1 COL1A2 CRABP2 CTSL ERBB2 FAT1 FN1 FOS FOXP3 GNG11 GZMB HIF1A HLA.B HSPB1 ICOS IFITM3 IGHG1 IGHG4 IGKC IL2RA JUN KIF23 KRT8 KRT18 KRT19 LAMA1 LYZ MDM2 MLPH MYL6 MYO10 NOTCH1 PABPC1 PGR PLVAP RPSA S100A8 SDC1 SOX10 SOX4 TFF1 THY1 TPM2 TTC6 XBP1 ZNF571	58
Tumor_ALDH1A3	Fibroblast	APOE C1QA CCNB1 CD24 CD36 CD3E CTSL FASN FAT1 FCN1 FGFR4 FOS FOXP3 GRB7 ICOS IGHG1 IGHG4 IGKC LST1 LYZ MAPK3 MDM2 MLPH PTTG1 RPSA S100A8 SLC39A6 SOX10 SULF1	29		APOE CD24 CD36 CD3E CTSL FASN FOS FOXP3 GRB7 ICOS LYZ MDM2 MLPH RPSA SOX10 C1QA CCNB1 FAT1 FCN1 FGFR4 IGHG1 IGHG4 IGKC LST1 MAPK3 PTTG1 S100A8 SLC39A6	28		APOE C1QA CCNB1 CD24 CD36 CD3E CTSL FASN FAT1 FCN1 FGFR4 FOS FOXP3 GRB7 ICOS IGHG1 IGHG4 IGKC LST1 LYZ MAPK3 MDM2 MLPH PTTG1 RPSA S100A8 SLC39A6 SOX10 SULF1	29		APOE C1QA CCNB1 CD24 CD36 CD3E CTSL FASN FAT1 FCN1 FGFR4 FOS FOXP3 GRB7 ICOS IGHG1 IGHG4 IGKC LST1 LYZ MAPK3 MDM2 MLPH PTTG1 RPSA S100A8 SLC39A6 SOX10	28
Tumor_EGFR	Fibroblast	APOE FOS FOXP3 GNG11 KIF23 LTF MYO10 PTPRC SULF1	9		APOE FOS FOXP3 LTF PTPRC GNG11 KIF23 MYO10	8		APOE FOS FOXP3 GNG11 KIF23 LTF MYO10 PTPRC SULF1	9		APOE FOS FOXP3 GNG11 KIF23 LTF MYO10 PTPRC	8
Tumor_EPCAM	Fibroblast	CCNB1 CD69 CDKN2A FABP7 FAP HSPG2 KIF23 LAMA1 LYZ NOTCH1 PECAM1 SKAP1 XBP1	13		CDKN2A FAP LYZ NOTCH1 PECAM1 SKAP1 XBP1 CCNB1 CD69 FABP7 KIF23 LAMA1	12		CCNB1 CD69 CDKN2A FABP7 FAP HSPG2 KIF23 LAMA1 LYZ NOTCH1 PECAM1 SKAP1 XBP1	13		CCNB1 CD69 CDKN2A FABP7 FAP KIF23 LAMA1 LYZ NOTCH1 PECAM1 SKAP1 XBP1	12
Tumor_CD44	Fibroblast	CCNB1 KIF23 KRT8 LAMA1 LYZ MYO10	6		LYZ CCNB1 KIF23 KRT8 LAMA1 MYO10	6		CCNB1 KIF23 KRT8 LAMA1 LYZ MYO10	6		CCNB1 KIF23 KRT8 LAMA1 LYZ MYO10	6
Tumor_PGR	Fibroblast	APOE CAPN13 CCNB1 CD24 CD36 CD68 CD69 CDK6 COL1A2 FAT1 FN1 FOS FOXP3 HIF1A HLA.B HSPB1 IGHG1 IGHG4 IGKC JUN KIF23 KRT19 LTF LYZ MDM2 MLPH MYL6 MYO10 PLVAP RPSA S100A8 SOX10 SOX4 SULF1 TPM2 XBP1 ZNF571	37		APOE CD24 CD36 FOS FOXP3 HIF1A HSPB1 JUN KRT19 LTF LYZ MDM2 MLPH MYL6 RPSA SOX10 SOX4 XBP1 ZNF571 CAPN13 CCNB1 CD68 CD69 CDK6 COL1A2 FAT1 FN1 HLA.B IGHG1 IGHG4 IGKC KIF23 MYO10 PLVAP S100A8 TPM2	36		APOE CAPN13 CCNB1 CD24 CD36 CD68 CD69 CDK6 COL1A2 FAT1 FN1 FOS FOXP3 HIF1A HLA.B HSPB1 IGHG1 IGHG4 IGKC JUN KIF23 KRT19 LTF LYZ MDM2 MLPH MYL6 MYO10 PLVAP RPSA S100A8 SOX10 SOX4 SULF1 TPM2 XBP1 ZNF571	37		APOE CAPN13 CCNB1 CD24 CD36 CD68 CD69 CDK6 COL1A2 FAT1 FN1 FOS FOXP3 HIF1A HLA.B HSPB1 IGHG1 IGHG4 IGKC JUN KIF23 KRT19 LTF LYZ MDM2 MLPH MYL6 MYO10 PLVAP RPSA S100A8 SOX10 SOX4 TPM2 XBP1 ZNF571	36
Tumor	Macrophage	ACTA2 CAPN13 CD74 FTL LYZ PECAM1 SDC1 TSPAN1 XBP1	9		ACTA2 CD74 FTL LYZ SDC1 TSPAN1 XBP1 CAPN13 PECAM1	9		ACTA2 CAPN13 CD74 FTL LYZ PECAM1 SDC1 TSPAN1 XBP1	9		ACTA2 CAPN13 CD74 FTL LYZ PECAM1 SDC1 TSPAN1 XBP1	9
Tumor_ALDH1A3	Macrophage	TSPAN1	1		TSPAN1	1		TSPAN1	1		TSPAN1	1
Tumor_EGFR	Macrophage	CDKN2A	1		CDKN2A	1		CDKN2A	1		CDKN2A	1
Tumor_EPCAM	Macrophage	NOTCH1	1		NOTCH1	1		NOTCH1	1		NOTCH1	1
Tumor_CD44	Macrophage	TFF1	1		TFF1	1		TFF1	1		TFF1	1
Tumor_PGR	Macrophage	CAPN13 DERL3 FOXP3 ISG20 XBP1	5		DERL3 FOXP3 XBP1 CAPN13 ISG20	5		CAPN13 DERL3 FOXP3 ISG20 XBP1	5		CAPN13 DERL3 FOXP3 ISG20 XBP1	5
Tumor	Tcell	CD24 CD3G COL1A1 ERBB2 FASN FAT1 FCN1 FGFR4 FN1 HSPB1 IFITM3 IGHG1 IGHG4 IGKC KRT18 KRT19 KRT8 LST1 LTF LYZ MAPK3 MT2A MYL6 NOTCH1 RPL18 RPSA S100A14 S100A8 SDC1 SLC39A6 TFF1 TFF3 TFRC TMSB4X XBP1	35		CD24 ERBB2 FASN HSPB1 IFITM3 KRT18 KRT19 KRT8 LYZ MT2A MYL6 NOTCH1 RPL18 RPSA S100A14 SDC1 TFF1 TFF3 TFRC TMSB4X XBP1 CD3G COL1A1 FAT1 FCN1 FGFR4 FN1 IGHG1 IGHG4 IGKC LST1 LTF MAPK3 S100A8 SLC39A6	35		CD24 CD3G COL1A1 ERBB2 FASN FAT1 FCN1 FGFR4 FN1 HSPB1 IFITM3 IGHG1 IGHG4 IGKC KRT18 KRT19 KRT8 LST1 LTF LYZ MAPK3 MT2A MYL6 NOTCH1 RPL18 RPSA S100A14 S100A8 SDC1 SLC39A6 TFF1 TFF3 TFRC XBP1	34		CD24 CD3G COL1A1 ERBB2 FASN FAT1 FCN1 FGFR4 FN1 HSPB1 IFITM3 IGHG1 IGHG4 IGKC KRT18 KRT19 KRT8 LST1 LTF LYZ MAPK3 MT2A MYL6 NOTCH1 RPL18 RPSA S100A14 S100A8 SDC1 SLC39A6 TFF1 TFF3 TFRC XBP1	34
Tumor_ALDH1A3	Tcell	CSTB ERBB2 FAT1 FCN1 FGFR4 IGHG1 IGHG4 IGKC KRT18 KRT19 LST1 LYZ MAPK3 PTTG1 S100A14 SLC39A6 SOX10 TFF1 TFF3 TMSB4X	20		CSTB ERBB2 KRT18 KRT19 LYZ S100A14 SOX10 TFF1 TFF3 TMSB4X FAT1 FCN1 FGFR4 IGHG1 IGHG4 IGKC LST1 MAPK3 PTTG1 SLC39A6	20		CSTB ERBB2 FAT1 FCN1 FGFR4 IGHG1 IGHG4 IGKC KRT18 KRT19 LST1 LYZ MAPK3 PTTG1 S100A14 SLC39A6 SOX10 TFF1 TFF3 TMSB4X	20		CSTB ERBB2 FAT1 FCN1 FGFR4 IGHG1 IGHG4 IGKC KRT18 KRT19 LST1 LYZ MAPK3 PTTG1 S100A14 SLC39A6 SOX10 TFF1 TFF3 TMSB4X	20
Tumor_EGFR	Tcell	COL1A2 COL3A1 COL4A1 FN1 SDC1	5		SDC1 COL1A2 COL3A1 COL4A1 FN1	5		COL1A2 COL3A1 COL4A1 FN1 SDC1	5		COL1A2 COL3A1 COL4A1 FN1 SDC1	5
Tumor_EPCAM	Tcell	APOE ERBB2 FASN HSPB1 KRT18 KRT19 MT2A MYL6 NOTCH1 RPSA TMSB4X	11		APOE ERBB2 FASN HSPB1 KRT18 KRT19 MT2A MYL6 NOTCH1 RPSA TMSB4X	11		APOE ERBB2 FASN HSPB1 KRT18 KRT19 MT2A MYL6 NOTCH1 RPSA TMSB4X	11		APOE ERBB2 FASN HSPB1 KRT18 KRT19 MT2A MYL6 NOTCH1 RPSA TMSB4X	11
Tumor_CD44	Tcell	FOXP3 SDC1 TFF1	3		SDC1 TFF1 FOXP3	3		FOXP3 TFF1	2		FOXP3 TFF1	2
Tumor_PGR	Tcell	CD24 FASN FAT1 HSPB1 KRT18 KRT19 LST1 LYZ MAPK3 MT2A MYL6 S100A8 TMSB4X	13		CD24 FASN HSPB1 KRT18 KRT19 LYZ MT2A MYL6 TMSB4X FAT1 LST1 MAPK3 S100A8	13		CD24 FASN FAT1 HSPB1 KRT18 KRT19 LST1 LYZ MAPK3 MT2A MYL6 S100A8 TMSB4X	13		CD24 FASN FAT1 HSPB1 KRT18 KRT19 LST1 LYZ MAPK3 MT2A MYL6 S100A8 TMSB4X	13
Tumor	Tcell_CD3D	C1QA ERBB2 FABP7 FASN FAT1 FGFR4 GRB7 HSPB1 IFITM3 IGHG1 IGHG4 IGKC KRT18 KRT19 LYZ MAPK3 MDM2 MYL6 NOTCH1 S100A14 TMSB4X	21		ERBB2 FASN GRB7 HSPB1 IFITM3 KRT18 KRT19 LYZ MDM2 MYL6 NOTCH1 S100A14 TMSB4X C1QA FABP7 FAT1 FGFR4 IGHG1 IGHG4 IGKC MAPK3	21		C1QA ERBB2 FABP7 FASN FAT1 FGFR4 GRB7 HSPB1 IFITM3 IGHG1 IGHG4 IGKC KRT18 KRT19 LYZ MAPK3 MDM2 MYL6 NOTCH1 S100A14 TMSB4X	21		C1QA ERBB2 FABP7 FASN FAT1 FGFR4 GRB7 HSPB1 IFITM3 IGHG1 IGHG4 IGKC KRT18 KRT19 LYZ MAPK3 MDM2 MYL6 NOTCH1 S100A14 TMSB4X	21
Tumor_ALDH1A3	Tcell_CD3D	FAT1 FGFR4 GRB7 HSPB1 IFITM3 IGHG1 IGHG4 IGKC KRT18 MAPK3 MYL6 S100A14 SLC39A6	13		GRB7 HSPB1 IFITM3 KRT18 MYL6 S100A14 FAT1 FGFR4 IGHG1 IGHG4 IGKC MAPK3 SLC39A6	13		FAT1 FGFR4 GRB7 HSPB1 IFITM3 IGHG1 IGHG4 IGKC KRT18 MAPK3 MYL6 S100A14 SLC39A6	13		FAT1 FGFR4 GRB7 HSPB1 IFITM3 IGHG1 IGHG4 IGKC KRT18 MAPK3 MYL6 S100A14 SLC39A6	13
Tumor_EGFR	Tcell_CD3D	RRM2	1		RRM2	1		RRM2	1		RRM2	1
Tumor_EPCAM	Tcell_CD3D	CD68 CDKN2A COL3A1 GRB7 HSPB1 KRT18 NOTCH1 TFRC	8		CD68 CDKN2A GRB7 HSPB1 KRT18 NOTCH1 TFRC COL3A1	8		CD68 CDKN2A COL3A1 GRB7 HSPB1 KRT18 NOTCH1 TFRC	8		CD68 CDKN2A COL3A1 GRB7 HSPB1 KRT18 NOTCH1 TFRC	8
Tumor_CD44	Tcell_CD3D	NOTCH1	1		NOTCH1	1		NOTCH1	1		NOTCH1	1
Tumor_PGR	Tcell_CD3D	CCND1 CD24 KRT18 KRT19 LYZ MDM2 TMSB4X	7		CCND1 CD24 KRT18 KRT19 LYZ MDM2 TMSB4X	7		CCND1 CD24 KRT18 KRT19 LYZ MDM2 TMSB4X	7		CCND1 CD24 KRT18 KRT19 LYZ MDM2 TMSB4X	7
Tumor	Tcell_CD4	FAT1 FN1 IGHG1 IGHG4 IGHM XCL1	6		IGHM XCL1 FAT1 FN1 IGHG1 IGHG4	6		FAT1 FN1 IGHG1 IGHG4 IGHM XCL1	6		FAT1 FN1 IGHG1 IGHG4 IGHM XCL1	6
Tumor_ALDH1A3	Tcell_CD4	FASN IGHG1	2		FASN IGHG1	2		FASN IGHG1	2		FASN IGHG1	2
Tumor_EGFR	Tcell_CD4	-	-		-	-		-	-		-	-
Tumor_EPCAM	Tcell_CD4	APOE	1		APOE	1		APOE	1		APOE	1
Tumor_CD44	Tcell_CD4	ZNF571	1		ZNF571	1		ZNF571	1		ZNF571	1
Tumor_PGR	Tcell_CD4	CDK7 IGHM XCL1	3		CDK7 IGHM XCL1	3		CDK7 IGHM XCL1	3		CDK7 IGHM XCL1	3
Tumor	Tcell_CD8A	ACTA2 COL1A2 CSTB ERBB2 FASN FAT1 FGFR4 FN1 FOXP3 HSPB1 IFITM3 IGF1R IGHG1 IGHG4 KIF23 KRT18 KRT19 KRT8 LST1 LTF MAPK3 MT2A MYL6 MYO10 NKG7 PTPRC RPL18 RPSA RRM2 S100A14 SDC1 SULF1 TFEC TFF1 TFRC TMSB4X TTC6 XBP1	38		ACTA2 CSTB ERBB2 FASN HSPB1 IFITM3 IGF1R KIF23 KRT18 KRT19 KRT8 MT2A MYL6 MYO10 NKG7 PTPRC RPL18 RPSA RRM2 S100A14 SDC1 TFEC TFF1 TFRC TMSB4X TTC6 XBP1 COL1A2 FAT1 FGFR4 FN1 FOXP3 IGHG1 IGHG4 LST1 LTF MAPK3 SULF1	38		ACTA2 COL1A2 CSTB ERBB2 FASN FAT1 FGFR4 FN1 FOXP3 HSPB1 IFITM3 IGF1R IGHG1 IGHG4 KIF23 KRT18 KRT19 KRT8 LST1 LTF MAPK3 MT2A MYL6 MYO10 NKG7 PTPRC RPL18 RPSA RRM2 S100A14 SDC1 SULF1 TFEC TFF1 TFRC TMSB4X TTC6 XBP1	38		ACTA2 COL1A2 CSTB ERBB2 FASN FAT1 FGFR4 FN1 FOXP3 HSPB1 IFITM3 IGF1R IGHG1 IGHG4 KIF23 KRT18 KRT19 KRT8 LST1 LTF MAPK3 MT2A MYL6 MYO10 NKG7 PTPRC RPL18 RPSA RRM2 S100A14 SDC1 SULF1 TFEC TFF1 TFRC TMSB4X TTC6 XBP1	38
Tumor_ALDH1A3	Tcell_CD8A	CSTB ERBB2 FAT1 IGHG1 IGHG4 KIF23 KRT19 KRT8 MYO10 PTTG1 SDC1 SLC39A6 TFEC TFRC TMSB4X TSPAN1 TTC6	17		CSTB ERBB2 KIF23 KRT19 KRT8 MYO10 SDC1 TFEC TFRC TMSB4X TSPAN1 TTC6 FAT1 IGHG1 IGHG4 PTTG1 SLC39A6	17		CSTB ERBB2 FAT1 IGHG1 IGHG4 KIF23 KRT19 KRT8 MYO10 PTTG1 SDC1 SLC39A6 TFEC TFRC TMSB4X TSPAN1 TTC6	17		CSTB ERBB2 FAT1 IGHG1 IGHG4 KIF23 KRT19 KRT8 MYO10 PTTG1 SDC1 SLC39A6 TFEC TFRC TMSB4X TSPAN1 TTC6	17
Tumor_EGFR	Tcell_CD8A	CD36 COL1A2 COL3A1 COL4A1 ERBB2 FASN FOS FOXP3 LTF PTPRC SDC1	11		ERBB2 FASN PTPRC SDC1 CD36 COL1A2 COL3A1 COL4A1 FOS FOXP3 LTF	11		CD36 COL1A2 COL3A1 COL4A1 ERBB2 FASN FOS FOXP3 LTF PTPRC SDC1	11		CD36 COL1A2 COL3A1 COL4A1 ERBB2 FASN FOS FOXP3 LTF PTPRC SDC1	11
Tumor_EPCAM	Tcell_CD8A	CCNB1 CDK6 FASN HSPB1 IFITM3 KRT18 KRT19 KRT8 LILRB1 MT2A MYL6 RPSA STMN1 TFF1 TMSB4X XBP1	16		CCNB1 CDK6 FASN HSPB1 IFITM3 KRT18 KRT19 KRT8 LILRB1 MT2A MYL6 RPSA STMN1 TFF1 TMSB4X XBP1	16		CCNB1 CDK6 FASN HSPB1 IFITM3 KRT18 KRT19 KRT8 LILRB1 MT2A MYL6 RPSA STMN1 TFF1 TMSB4X XBP1	16		CCNB1 CDK6 FASN HSPB1 IFITM3 KRT18 KRT19 KRT8 LILRB1 MT2A MYL6 RPSA STMN1 TFF1 TMSB4X XBP1	16
Tumor_CD44	Tcell_CD8A	FOXP3 SDC1 TFF1	3		SDC1 TFF1 FOXP3	3		FOXP3 SDC1 TFF1	3		FOXP3 SDC1 TFF1	3
Tumor_PGR	Tcell_CD8A	FAT1 FN1 HSPB1 MT2A POU2AF1	5		HSPB1 MT2A POU2AF1 FAT1 FN1	5		FAT1 FN1 HSPB1 MT2A POU2AF1	5		FAT1 FN1 HSPB1 MT2A POU2AF1	5
			862			819			849			805
											0.965228
