# Supplementary material
Source: HighWire-hosted journal article supplement (doi:10.1101/rna.079801.123)
Supplement: Supplemental_Table_9.xlsx [file Supplemental_Table_9.xlsx]

## Sheet: B cell
B cell
Gene name	MoransI real	MoransI perm avg	MoransI perm std	MoransI pv (<0.01)
ADGRL4	0.279574	0.168379	0.027367	0.000423005
AHR	0.441065	0.26249	0.028172	4.91265e-09
APOC1	0.251185	0.145954	0.032939	0.00670391
AR	0.244066	0.131935	0.033565	0.00477216
BCL2	0.253788	0.149437	0.031814	0.00537079
BIRC5	0.180214	0.074405	0.029867	0.00280117
CD163	0.467053	0.191024	0.033214	0
FOXA1	0.290611	0.186569	0.031748	0.00537079
GNLY	0.24831	0.145773	0.030138	0.00401355
HLA-DPA1	0.229801	0.119729	0.030126	0.00191858
ICAM1	0.245088	0.148239	0.031102	0.00830736
IL2RA	0.361753	0.25338	0.028764	0.00132773
IL32	0.274128	0.10681	0.033204	6.31315e-06
ISG20	0.379142	0.171849	0.031191	1.11918e-09
LILRB1	0.316598	0.201789	0.033437	0.00384635
LUM	0.306208	0.167908	0.029619	3.20461e-05
MIA	0.225906	0.047927	0.028945	1.44816e-08
MYO10	0.31364	0.225224	0.027344	0.00605482
NDC80	0.41093	0.323436	0.023269	0.00132773
NDRG2	0.194503	0.033408	0.032186	6.90854e-06
NFKBIA	0.15184	0.063475	0.028113	0.00775646
NOTCH1	0.407898	0.282996	0.029925	0.000296494
NUF2	0.312581	0.205133	0.026417	0.000423005
PIK3CA	0.288017	0.078451	0.03216	1.78305e-09
RAMP2	0.152425	0.051239	0.03076	0.00537079
RB1	0.333333	0.172229	0.031047	3.48921e-06
SKAP1	0.213457	0.091974	0.035738	0.00401355
SLC39A6	0.615159	0.490411	0.013363	0
SOX18	0.350607	0.060828	0.037503	5.4956e-13
SPDEF	0.314597	0.158932	0.03013	3.54166e-06
STAT5A	0.241488	0.107114	0.028772	3.20461e-05
TMEM45B	0.306309	0.202689	0.029448	0.00292598
TYMS	0.419877	0.204946	0.032522	1.15154e-09

## Sheet: T cell
T cell
Gene name	MoransI real	MoransI perm avg	MoransI perm std	MoransI pv (<0.001)
BIRC5	0.178921	0.079307	0.025841	0.000452337
C10orf54	0.184652	0.053194	0.025231	1.5571e-06
C1QB	0.218385	0.119042	0.025595	0.000417012
CALCRL	0.285008	0.144059	0.022846	1.1303e-08
CCL3	0.20857	0.082363	0.026593	1.46815e-05
CCL5	0.226303	0.145186	0.022333	0.000948512
CD274	0.253468	0.081213	0.024106	2.21418e-11
CD44	0.244162	0.146429	0.023882	0.000192138
CD79B	0.248089	0.127216	0.024634	7.23375e-06
CST3	0.330027	0.218173	0.023873	1.86121e-05
CSTB	0.427501	0.224962	0.02084	0
CTLA4	0.149195	0.048475	0.022166	3.15371e-05
DCN	0.263594	0.152302	0.024564	3.23338e-05
EGFR	0.321315	0.11171	0.025586	6.59472e-15
ERBB4	0.184272	0.042137	0.023829	3.63695e-08
ESR1	0.242107	0.140995	0.02384	0.000109965
FASN	0.344134	0.28571	0.015931	0.000846408
FCN1	0.134556	0.048545	0.023844	0.000998884
GNG11	0.36321	0.20423	0.023784	4.30458e-10
GNLY	0.328632	0.158262	0.023951	2.40566e-11
GPNMB	0.14099	0.068065	0.020216	0.000998884
HLA-DPA1	0.162651	0.061888	0.022924	5.8591e-05
HLA-E	0.188597	0.091065	0.023422	0.000149788
ICAM1	0.241856	0.109181	0.023121	1.09219e-07
JUNB	0.223217	0.136341	0.024121	0.000998884
KIF23	0.365979	0.261885	0.018527	1.90607e-07
KRAS	0.324165	0.21583	0.023327	2.0924e-05
LDB2	0.231101	0.124541	0.022774	1.86121e-05
LGMN	0.178242	0.086202	0.024615	0.000668506
MS4A1	0.372262	0.187948	0.020855	0
MUC1	0.159754	0.060621	0.024498	0.000227022
MYBL2	0.20917	0.086297	0.026494	2.0924e-05
MYL9	0.331556	0.221421	0.019293	1.20831e-07
MYLK	0.140863	0.045785	0.025247	0.000631746
MYO10	0.287944	0.175359	0.023462	1.18669e-05
NF1	0.190115	0.063947	0.023529	7.1805e-07
PTEN	0.263373	0.109422	0.026182	5.07929e-08
RB1	0.258832	0.1652	0.022752	0.000179469
S100A14	0.328742	0.233164	0.022379	9.9658e-05
SFRP1	0.271562	0.121928	0.025214	3.97478e-08
SLPI	0.123295	0.026989	0.02419	0.00029091
TCF4	0.340287	0.213294	0.022758	2.23129e-07
TCL1A	0.179414	0.085173	0.024222	0.000412308
TIMP1	0.250085	0.166747	0.022332	0.00067243
TMEM45B	0.374048	0.168484	0.023271	0
TRDC	0.200546	0.114195	0.02304	0.00066212
TTC6	0.372565	0.171459	0.021873	0

## Sheet: Fibroblast
Fibroblast
Gene name	MoransI real	MoransI perm avg	MoransI perm std	MoransI pv (<0.01)
ACTG2	0.266692	0.124848	0.036785	0.000713192
ACTR3B	0.226312	0.118322	0.035921	0.00913215
AGR2	0.414486	0.28762	0.032486	0.000635255
AHR	0.33716	0.199445	0.029277	4.21154e-05
AIF1	0.186309	0.069227	0.036664	0.00522149
AR	0.414844	0.244166	0.034945	2.20308e-05
AURKA	0.538348	0.343154	0.025313	1.84652e-12
B2M	0.399383	0.294337	0.030446	0.00252001
BRAF	0.309636	0.208483	0.032627	0.00700245
CD19	0.442083	0.291047	0.033765	0.000114427
CD2	0.363255	0.253597	0.026698	0.000371382
CD4	0.259603	0.116355	0.033193	0.000181845
CD40LG	0.400678	0.201686	0.031325	7.86054e-09
CD63	0.439245	0.340151	0.03053	0.00457722
CEP55	0.272752	0.126588	0.033197	0.000144142
CLU	0.250839	0.124494	0.03264	0.000700152
COBL	0.197833	0.06998	0.034201	0.00105814
EGFR	0.197395	0.093904	0.033597	0.00731037
ERBB3	0.347827	0.22573	0.037773	0.00467417
ESR1	0.441656	0.339264	0.029937	0.00265413
FTL	0.54461	0.459051	0.024313	0.00202988
GATA3	0.545287	0.45707	0.020735	0.000207442
HLA-C	0.418557	0.258339	0.03345	3.09983e-05
HSPB1	0.585758	0.506259	0.018566	0.000196531
ITGAX	0.221876	0.09394	0.03524	0.00155663
KRT15	0.277455	0.150557	0.035287	0.00162252
LGALS1	0.434892	0.30988	0.031204	0.000482154
MELK	0.212586	0.080033	0.033323	0.000516414
OBP2B	0.312932	0.197528	0.030195	0.000786473
ORC6	0.382149	0.166131	0.031903	7.40664e-10
PABPC1	0.492667	0.406733	0.028903	0.00972536
PDCD1	0.248487	0.131405	0.034183	0.00265413
PHGDH	0.488287	0.325327	0.03134	4.93968e-06
PRLR	0.257248	0.146679	0.031444	0.00202988
RPL13	0.46372	0.371556	0.027395	0.00308011
RPL18	0.470722	0.363787	0.029768	0.00162252
SFRP1	0.278552	0.145465	0.032783	0.000429305
SKAP1	0.442468	0.285134	0.03639	0.000181845
SPDEF	0.326194	0.21881	0.031724	0.00293613
TCL1A	0.30227	0.168953	0.033772	0.000558381
TIMP1	0.411237	0.278213	0.033028	0.000464771
TMSB10	0.544238	0.353525	0.031546	4.42416e-08
TP53	0.177474	0.082849	0.0316	0.00927839
XBP1	0.630593	0.50656	0.01838	7.40664e-10
XCL1	0.435957	0.336915	0.02756	0.00162252

## Sheet: Macrophage
Macrophage
Gene name	MoransI real	MoransI perm avg	MoransI perm std	MoransI pv (<0.01)
ACTA2	0.341278	0.171243	0.013401	0
ACTG2	0.132827	0.026306	0.02587	0.000236879
APOC1	0.123438	0.044334	0.021353	0.001084
BGN	0.082861	0.015945	0.021172	0.00599667
C1QB	0.131186	0.024634	0.022614	2.02656e-05
CALCRL	0.130568	0.022997	0.022112	1.13461e-05
CCL5	0.132101	0.037069	0.026064	0.00131785
CD7	0.104543	0.016632	0.02331	0.000860938
CDKN2A	0.123486	0.058778	0.021064	0.00770077
COL1A1	0.179847	0.055151	0.020268	1.2593e-08
CSTB	0.109746	0.037407	0.023063	0.00634572
ERBB2	0.147141	0.062598	0.019982	0.000156973
FAT1	0.230534	0.156279	0.018327	0.000302087
GNG11	0.168979	0.074135	0.021298	5.98341e-05
GNLY	0.102674	0.027919	0.022232	0.00318566
GPR160	0.105479	0.014371	0.026321	0.00227976
GZMB	0.120799	0.033259	0.024514	0.00166252
HLA-DRB1	0.206396	0.089943	0.020836	3.08347e-07
ICAM1	0.266892	0.02019	0.020828	0
LST1	0.263055	0.125035	0.017996	4.28657e-13
LYPD6B	0.11204	0.046211	0.020487	0.00512964
MELK	0.129136	0.014167	0.025163	3.63961e-05
MIA	0.109508	0.007706	0.020884	1.13461e-05
MKI67	0.123008	0.043626	0.02103	0.000860938
NDC80	0.107312	0.017846	0.017217	2.31976e-06
NDRG2	0.070127	0.001186	0.012578	5.23703e-07
NKG7	0.222932	0.036227	0.021375	0
PECAM1	0.132534	0.034715	0.020569	1.72703e-05
PHGDH	0.136458	0.060373	0.023662	0.00512964
PLEK	0.159938	0.052842	0.022083	1.14734e-05
PTPRB	0.133201	0.048027	0.023914	0.00166252
PTTG1	0.200431	0.074633	0.021531	7.63242e-08
S100A8	0.206129	0.076809	0.019082	2.59865e-10
SDC1	0.201127	0.057471	0.022633	4.06807e-09
SFRP1	0.253644	0.016697	0.023382	0
SPP1	0.153356	0.069653	0.023505	0.00166252
TFEC	0.127923	0.042172	0.022208	0.000644255
TIMP1	0.121898	0.04898	0.017512	0.000202087
TSPAN1	0.15147	0.059831	0.019799	2.87892e-05
TTC6	0.41876	0.041634	0.020828	0
UBE2T	0.060998	0.003328	0.016596	0.00223199
